# Irisin stimulates the release of CXCL1 from differentiating human subcutaneous and deep-neck derived adipocytes via upregulation of NFκB pathway

1 **Abhirup Shaw<sup>1,2#</sup>, Beáta B Tóth<sup>1#</sup>, Róbert Király<sup>1</sup>, Rini Arianti<sup>1,2</sup>, István Csomós<sup>3</sup>, Szilárd**  
2 **Póliska<sup>4</sup>, Attila Vámos<sup>1,2</sup>, Ilma R Korponay-Szabó<sup>5</sup>, Zsolt Bacso<sup>3</sup>, Ferenc Gyóry<sup>6</sup>, László**  
3 **Fésüs<sup>1,\*</sup>, □, Endre Kristóf<sup>1,\*</sup>, □**

4 <sup>1</sup>Laboratory of Cell Biochemistry, Department of Biochemistry and Molecular Biology, Faculty of  
5 Medicine, University of Debrecen, H-4032 Debrecen, Hungary

6 <sup>2</sup>Doctoral School of Molecular Cell and Immune Biology, University of Debrecen, H-4032  
7 Debrecen, Hungary

8 <sup>3</sup>Department of Biophysics and Cell Biology, Faculty of Medicine, University of Debrecen, H-4032  
9 Debrecen, Hungary

10 <sup>4</sup>Genomic Medicine and Bioinformatics Core Facility, Department of Biochemistry and Molecular  
11 Biology, Faculty of Medicine, University of Debrecen, H-4032 Debrecen, Hungary

12 <sup>5</sup>Department of Pediatrics, Faculty of Medicine, University of Debrecen, H-4032 Debrecen, Hungary

13 <sup>6</sup>Department of Surgery, Faculty of Medicine, University of Debrecen, H-4032 Debrecen, Hungary

14 \* Authors to whom correspondence should be addressed

15 # These authors have contributed equally to this work and share first authorship

16 □ These authors have contributed equally to this work and share last authorship

## 17 \* Correspondence:

18 László Fésüs

19 [fesus@med.unideb.hu](mailto:fesus@med.unideb.hu)

20 Endre Kristóf

21 [kristof.endre@med.unideb.hu](mailto:kristof.endre@med.unideb.hu)

22 **Keywords: obesity, adipose tissue, irisin, cytokines, CXCL1, integrins, NFκB, angiogenesis**

## 23 Abstract

24 Thermogenic brown and beige adipocytes play an important role in combating obesity. Recent  
25 studies in rodents and humans have indicated that these adipocytes release cytokines, termed  
26 “batokines”. Irisin was discovered as a polypeptide regulator of beige adipocytes released by  
27 myocytes, primarily during exercise. We performed global RNA sequencing on adipocytes derived  
28 from human subcutaneous and deep-neck precursors, which were differentiated in the presence or  
29 absence of irisin. Irisin did not exert an effect on the expression of characteristic thermogenic genes,  
30 while upregulated genes belonging to various cytokine signaling pathways. Out of the several  
31 upregulated cytokines, *CXCL1*, the highest upregulated, was released throughout the entire

32 differentiation period, and predominantly by differentiated adipocytes. Deep-neck area tissue  
33 biopsies also showed a significant release of CXCL1 during 24 hours irisin treatment. Gene  
34 expression data indicated upregulation of the NF $\kappa$ B pathway upon irisin treatment, which was  
35 validated by an increase of p50 and decrease of I $\kappa$ B $\alpha$  protein level, respectively. Continuous blocking  
36 of the NF $\kappa$ B pathway, using a cell permeable inhibitor of NF $\kappa$ B nuclear translocation, significantly  
37 reduced CXCL1 release. The released CXCL1 exerted a positive effect on the adhesion of endothelial  
38 cells. Together, our findings demonstrate that irisin stimulates the release of a novel “batokine”,  
39 CXCL1, via upregulation of NF $\kappa$ B pathway in neck area derived adipocytes, which might play an  
40 important role in improving tissue vascularization.

## 41 1 Introduction

42 Recent studies indicated the presence of thermogenic adipose tissue, capable of dissipating energy as  
43 heat under sub-thermal conditions in healthy human adults (1), (2). These are located in cervical,  
44 supraclavicular, axillary, mediastinal, paravertebral, and abdominal depots (3), (4), (5);  
45 supraclavicular, deep-neck (DN), and paravertebral having the highest amounts. Together these  
46 depots account for 5% of basal metabolic rate in adults, highlighting their importance in combating  
47 obesity and type 2 diabetes mellitus (6). In rodents, these thermogenic adipocytes are either classical  
48 brown or beige depending on their origin and distribution (7), (8). In addition to their role in  
49 thermogenesis, these adipocytes also secrete adipokines, termed ‘batokines’, which have been shown  
50 to exert autocrine, paracrine, or endocrine activity (9). For example, vascular endothelial growth  
51 factor A (VEGF-A) secreted by brown adipocytes promotes angiogenesis and vascularization of  
52 brown adipose tissue (BAT) (10), (11), (12) while Fibroblast growth factor (FGF) 21 enhances the  
53 being of white adipose tissue (WAT) and increases thermogenesis in BAT (13), (14), (15).  
54 Understanding the roles of batokines in the human body is an area of active research (16), (17).

55 Irisin, a cleaved product of the transmembrane protein FNDC5, was discovered as a myokine in mice  
56 and was shown to be a browning inducing endocrine hormone (18), (19), presumably acting via  
57 integrin receptors (20). In mice, irisin secretion was induced by physical exercise and shivering of  
58 skeletal myocytes, which induced a beige differentiation program in subcutaneous WAT (19). In  
59 humans, inconsistent effects were found when adipocytes of different anatomical origins were treated  
60 with recombinant irisin (21), (22), (23), (24), (25), (26). How irisin affects the differentiation of the  
61 thermogenically prone neck area adipocytes still awaits description. We have previously reported that  
62 human DN adipose tissue biopsies released significantly higher amounts of interleukin (IL)-6, IL-8,  
63 monocyte chemoattractant protein 1 (MCP1) as compared to subcutaneous ones, which was further  
64 enhanced upon irisin treatment (27). CXCL1, previously known as growth-related oncogene (GRO)-  
65  $\alpha$ , is a small peptide belonging to the CXC chemokine family; newly synthesized CXCL1 by vessel-  
66 associated endothelial cells and pericytes facilitates the process of neutrophil diapedesis (28).

67 In this study, we aimed to get an overview of all the genes whose expression is regulated by irisin.  
68 For this, we have performed a global RNA-Sequencing comprising of *ex vivo* differentiated  
69 adipocytes of subcutaneous and deep depots of human neck from 9 individuals and analysed the  
70 upregulated genes upon irisin treatment. Surprisingly, several genes which encode secreted proteins  
71 were upregulated. Out of those, chemokine C-X-C motif ligand (CXCL) 1 was found to be the  
72 highest expressed and a novel batokine induced in differentiating adipocytes of both origins. The  
73 CXCL1 release was stimulated predominantly via the upregulation of nuclear factor- $\kappa$ B (NF $\kappa$ B)  
74 pathway. We found that the secreted CXCL1 had an adhesion promoting effect on endothelial cells,  
75 supporting that irisin can exert effects not directly linked to heat production.

## 76 **2 Materials and methods**

### 77 **2.1 Materials**

78 All chemicals were obtained from Sigma Aldrich (Munich, Germany) unless otherwise stated.

### 79 **2.2 Isolation, cell culture, differentiation, and treatment of hASCs**

80 Human adipose-derived stromal cells (hASCs) were obtained from stromal-vascular fractions of  
81 subcutaneous neck (SC) and DN tissues of volunteers, aged between 20-65 years, undergoing  
82 planned surgical treatment. A pair of biopsies from SC and DN areas was obtained from the same  
83 donor, to avoid inter-individual variations. Patients with known diabetes, malignant tumour or with  
84 abnormal thyroid hormone levels were excluded from the study. Written informed consent was  
85 obtained from all participants before the surgery.

86 hASCs were isolated and cultivated as previously described (27), (29). The absence of mycoplasma  
87 was confirmed by PCR analysis (PCR Mycoplasma Test Kit I/C, Promocell, Heidelberg, Germany).  
88 Cells were differentiated following a reported white adipogenic differentiation protocol, with or  
89 without the addition of human recombinant irisin (Cayman Chemicals, MI, USA) at 250 ng/mL  
90 concentration (27), (30). Media were changed every other four days and cells were used after 14 days  
91 of differentiation. Where indicated, cells were treated with RGDS peptide (10 µg/mL, R&D systems,  
92 MN, USA) (20) or SN50 (50 µg/mL, Med Chem Express, NJ, USA) (31).

### 93 **2.3 RNA isolation, RT-qPCR, and RNA-Sequencing**

94 Cells were collected in Trizol reagent (Thermo Fisher Scientific, MA, USA) and RNA was isolated  
95 manually by chloroform extraction and isopropanol precipitation. To obtain global transcriptome  
96 data, high throughput mRNA sequencing was performed on Illumina Sequencing platform (29).  
97 Grouping was performed based on Panther Reactome pathways (<https://pantherdb.org>). Heatmap  
98 visualization was performed on the Morpheus web tool  
99 (<https://software.broadinstitute.org/morpheus>) using Pearson correlation of rows and complete  
100 linkage based on calculated z-score of DESeq normalized data after log<sub>2</sub> transformation (29). The  
101 interaction networks were determined using STRING (<https://string-db.org>) and constructed using  
102 Gephi 0.9.2 (<https://gephi.org>). The size of the nodes was determined based on fold change (29).

103 For RT-PCR, RNA quality was evaluated by spectrophotometry and cDNA was generated by  
104 TaqMan reverse transcription reagents kit (Thermo Fisher Scientific) followed by qPCR analysis  
105 (32).

### 106 **2.4 Antibodies and Immunoblotting**

107 Samples were collected, separated by SDS-PAGE, and transferred to PVDF Immobilon-P transfer  
108 membrane (Merck-Millipore, Darmstadt, Germany) as previously described (32). The following  
109 primary antibodies were used overnight in 1% skimmed milk solution: anti-p50 (1:1000, 13755,  
110 Cayman Chemicals), anti- IκBα (1:1000, 4812, Cell Signaling Technology, MA, USA), and anti-β-  
111 actin (1:5000, A2066, Novus Biologicals, CO, USA). HRP-conjugated goat anti-rabbit (1:10,000,  
112 Advansta, CA, USA, R-05072-500) or anti-mouse (1:5000, Advansta, R-05071-500) IgG were used  
113 as secondary antibodies, respectively. Immobilon western chemiluminescence substrate (Merck-  
114 Millipore) was used to visualize the immunoreactive proteins. FIJI was used for densitometry.

### 115 **2.5 Immunostaining analysis and image analysis**

116 hASCs from SC and DN areas were plated and differentiated in 8 well Ibidi  $\mu$ -chambers (Ibidi  
117 GmbH, Gräfelfing, Germany). Cells were treated with Brefeldin A (100 ng/mL) 24 hours prior  
118 collection to sequester the released CXCL1 (27), (31). After that, cells were washed with PBS, fixed  
119 by 4% paraformaldehyde, permeabilized with 0.1% saponin and blocked by 5% milk as per described  
120 protocols (32). The cells were incubated subsequently with anti-CXCL1 primary antibody (1:100,  
121 712317, Thermo Fisher Scientific) and Alexa 488 goat anti-rabbit IgG (1:1000, A11034, Thermo  
122 Fischer Scientific) secondary antibody for 12 and 3 hours at room temperature, respectively.  
123 Propidium iodide (1.5  $\mu$ g/mL, 1 hour) was used to label the nuclei. Images were acquired with  
124 Olympus FluoView 1000 confocal microscope and analysed by FIJI as described previously (32).  
125 Adipogenic differentiation rate was quantified as described previously (25), (33).

## 126 **2.6 Determination of the released factors**

127 Supernatants of samples from cell culture experiments were collected at the regular replacement of  
128 the media, on days 4, 12, 18, 21 of differentiation, wherever indicated. For SC and DN, supernatants  
129 were collected and stored at -20 °C from the differentiated cells of the same donor and considered as  
130 one repetition, followed by repetition with subsequent donors. For tissues, 10–20  $\mu$ mg of SC and DN  
131 tissue samples from the same donor were floated for 24  $\mu$ hours in DMEM-F12-HAM medium with  
132 or without the presence of 250 ng/mL irisin (27), (34). The release of CXCL1, CX3CL1, IL-32,  
133 TNF $\alpha$  and IL1- $\beta$  were analysed from the stored samples using ELISA Kits (R&D systems, MN,  
134 USA).

## 135 **2.7 Adhesion assay**

136 Human Umbilical Vein Endothelial Cells (HUVEC) cell line, HUCB2 was generated from  
137 endothelial cells isolated from the human umbilical cord vein of a healthy newborn by collagenase  
138 digestion as described earlier (35). Cells were cultured in M199 medium (Biosera, Nuaille, France)  
139 containing 10% FBS (Thermo Fisher Scientific), 10% EGM2 Endothelial Growth Medium (Lonza,  
140 Basel, Switzerland), 20 mM HEPES (Biosera), 100 U/mL Penicillin, 100  $\mu$ g/mL Streptomycin and  
141 2.5  $\mu$ g/mL Amphotericin B (Biosera), and immortalized by the viral delivery of telomerase gene  
142 using pBABE-neo-hTERT (36) (gift from Bob Weinberg, 1774, Addgene). The virus packaging was  
143 performed in HEK293FT cells (Thermo Fisher Scientific) based on a calcium precipitation method  
144 using pUMVC and pCMV-VSV-G vectors (37) (gift from Bob Weinberg, 8449 and 8454, Addgene).  
145 The pseudovirion containing supernatant was used for infection, and selection was started 72 hours  
146 later using 300  $\mu$ g/mL G418 (Merck-Millipore). Immortalized cells completely retain the  
147 morphological properties of primary endothelial cells.

148 Prior to the adhesion assay, EGM2 was omitted from the standard medium of HUCB2 cells and FBS  
149 content was decreased to 1% for 24 hours. 96-well plates (Thermo Fisher Scientific) were precoated  
150 with fibronectin (Merck-Millipore) at 1.25  $\mu$ g/mL concentration in PBS, for 1 hour at 37°C and then  
151 washed twice with PBS. Cells were plated at 1000 cells/well density and left to adhere for 2 hours in  
152 the CO<sub>2</sub>-incubator in the mixture (1:1 ratio) of starvation and conditioned media (incubation period  
153 from day 8 to 12 of differentiation) from SC and DN adipocytes, differentiated in the presence or  
154 absence of 250 ng/mL irisin, respectively. Where indicated, recombinant human CXCL1 (275-GR,  
155 R&D Systems) was used at 2500 pg/mL concentration in starvation media. Unattached cells were  
156 removed by once washing with PBS and adhered cells were incubated with starvation media  
157 containing CellTiter-Blue Cell Viability reagent (resazurin; Promega, WI, USA; 36 times dilution).  
158 To determine the ratio of attached cells in various conditions, the fluorescent intensity change of each  
159 well (Ex:530nm/Em:590nm), due to the conversion of resazurin to resorufin by cellular metabolism,

160 was measured using Synergy H1 (BioTek, Hungary) plate reader 2, 4, 6, 18, and 24 hours after  
161 adding resazurin. The effects of conditioned media and recombinant CXCL1 on the adhesion were  
162 expressed as fold changes of the fluorescent intensity growth rate (slope) relative to their respective  
163 controls after subtraction of only starvation media and only cells from each value.

## 164 **2.8 Statistics and Image analysis/preparation**

165 Results are expressed as mean±SD for the number of independent repetitions indicated. For multiple  
166 comparisons of groups, statistical significance was determined by one-way analysis of variance  
167 followed by Tukey *post hoc* test. In comparison of two groups, two-tailed paired Student's t-test was  
168 used. For the design of graphs and evaluation of statistics, Graphpad Prism 9 was used.

## 169 **3 Results**

### 170 **3.1 Irisin did not change the differentiation potential of adipocytes while increased the** 171 **expression of integrin receptor genes in both subcutaneous (SC) and deep-neck (DN)** 172 **origins**

173 Primary hASCs from 9 independent donors were isolated and cultivated from SC and DN area of  
174 human neck, as described (29). Adipogenic differentiation was driven by a white adipocyte  
175 differentiation medium with or without the presence of irisin for 14 days. Then, the global gene  
176 expression pattern of differentiated adipocytes and undifferentiated hASCs were determined by  
177 global RNA-sequencing (29). Gene expression of general adipocyte markers (e.g. *FABP4*, *ADIPOQ*)  
178 was higher in all differentiated adipocytes as compared to preadipocytes (Figure 1A). Quantification  
179 of the adipogenic differentiation rate by laser-scanning cytometry (25) revealed that more than 50%  
180 of the cells were differentiated following our 14-days long differentiation protocol (Figure 1B). The  
181 presence of irisin did not affect the differentiation and gene expression of general adipocyte markers  
182 (Figure 1 A,B). A recent publication proposed the irisin receptors to be integrins (*ITGAV*-  
183 *ITGB1/3/5*) (20). Hence the expression of *ITGAV* was analysed from RNA-sequencing data (Figure  
184 1C), which revealed that it is expressed in both the preadipocytes and differentiated adipocytes. Upon  
185 RT-qPCR validation, a significant increase of *ITGAV* expression was observed in both SC and DN  
186 adipocytes in response to irisin (Figure 1D). RNA-sequencing data showed that *ITGB1*, 3, and 5 were  
187 also expressed at a high extent in preadipocytes and in differentiated adipocytes irrespective of the  
188 presence of irisin (Supplementary Figure 1).

### 189 **3.2 Genes involved in chemokine signaling pathways were upregulated in adipocytes** 190 **differentiated with irisin**

191 RNA-Sequencing analysis identified 79 genes to be higher expressed upon irisin treatment that are  
192 visualized by a Volcano plot (Figure 2A). 50 and 66 genes were significantly upregulated in SC and  
193 DN area adipocytes, respectively, each of which are listed in Supplementary Table 1. 37 genes,  
194 including *CXCL1*, *CX3CL1*, *IL32*, *IL34*, *IL6*, and *CCL2* were found to be commonly upregulated in  
195 adipocytes of both depots (Figure 2A, 2B, Supplementary Table 1). Surprisingly, thermogenic  
196 marker genes did not appear among these. Panther enrichment analysis of genes upregulated in both  
197 SC and DN adipocytes by irisin treatment revealed pathways such as cytokine signaling (*NFKB2*,  
198 *CXCL1*, *CXCL2*, *IL32*, *IL34*, *IL6*, *CCL2*), interleukin-4 and 13 signaling (*IL6*, *CCL2*, *JUNB*,  
199 *ICAM1*), and class A/1 rhodopsin like receptors (*CXCL3*, *CXCL5*, *CX3CL1*, *CXCL2*, *CCL2*, *CXCL1*),  
200 which were commonly upregulated in both SC and DN adipocytes (Table 1). Gephi diagrams  
201 illustrate the interaction of upregulated genes belongs to several pathways (Figure 2-D). Interleukin-  
202 10 signaling were amongst the upregulated pathways in SC adipocytes (Figure 2C), while in DN, G-

203 alpha-I and response to metal ions were upregulated (Figure 2D). Cluster analyses and heatmap  
204 illustration of the gene expression values of the 79 higher expressed genes upon irisin treatment  
205 identified two main clusters: a cluster of 25 genes that uniquely expressed in irisin treated mature  
206 adipocytes, and another group of genes that are expressed highly in preadipocytes, but suppressed in  
207 differentiated adipocytes without irisin treatment (Supplementary figure 2). The higher expression of  
208 *IL6*, *CCL2*, *CX3CL1*, and *IL32*, cytokine encoding genes was observed by both RNA Sequencing and  
209 RT-qPCR analysis (Supplementary figure 3). Release of IL-6 and MCP1, encoded by *CCL2*, was  
210 detected from conditioned media collected during differentiation and was found to be specifically  
211 released by differentiated lipid laden adipocytes as described in our previous publication (27). Next,  
212 we investigated if fractalkine (encoded by *CX3CL1* gene) and IL-32 were released into the  
213 conditioned media collected during the differentiation on days number 4 and 12; however, we were  
214 unable to detect these factors (data not shown).

### 215 **3.3 Irisin dependent induction of CXCL1 release occurred predominantly from** 216 **differentiating and mature adipocytes**

217 Irisin upregulated *CXCL1* gene expression at the largest extent in both SC and DN area adipocytes  
218 (Figure 2A, 3A, Supplementary table 1). This observation was verified by RT-qPCR (Figure 3B). As  
219 a next step, release of CXCL1 from irisin treated and untreated adipocytes was investigated into the  
220 conditioned differentiation media collected on the fourth and twelfth days of differentiation. Irisin  
221 treatment resulted in significant increase in CXCL1 secretion at the intervals of days 0-4 and 8-12 in  
222 both types of adipocytes (Figure 3C).

223 We aimed to further investigate the dependence of CXCL1 release on the presence of irisin.  
224 Therefore, we differentiated hASCs for 21 days, with three sets of samples, each from SC and DN  
225 derived adipocytes. Two sets of hASCs were differentiated as previously described, and for the third  
226 set, irisin treatment was discontinued after 14 days. Conditioned media were collected on days  
227 number 4, 12, 18, 21 and measured for the release of CXCL1. Large amounts of CXCL1 were  
228 secreted throughout the differentiation period in the presence of irisin; however, discontinuation of  
229 irisin administration led to gradual and significant reduction of the released chemokine (Figure 3D).

230 A recent publication indicated that RGDS peptide, an integrin receptor inhibitor, can potentially  
231 inhibit the effect of irisin (20). Hence, we checked the effect of this peptide on the release of CXCL1  
232 on top of irisin treatment. RGDS partially reduced the irisin-stimulated release of CXCL1 by DN  
233 adipocytes at day 12 of the differentiation period (Figure 3E).

234 Release of CXCL1 throughout the whole differentiation period raised a possibility that both  
235 undifferentiated preadipocytes and differentiated adipocytes are able to release the chemokine. To  
236 investigate this, the secretion machinery of the mixed cell population was inhibited, followed by  
237 CXCL1 immunostaining and image acquisition by confocal microscopy. Irisin treatment significantly  
238 increased CXCL1 immunostaining intensity in both SC (Figure 4A) and DN adipocytes (Figure 4B).  
239 Irisin treated adipocytes accumulated significantly more CXCL1 compared to their preadipocyte  
240 counterparts in both SC (Figure 4A) and DN areas (Figure 4B). Secondary antibody control images  
241 proved the specificity of the primary antibody used (Supplementary figure 4). Our data suggests that  
242 irisin stimulates the release of CXCL1 from differentiating and mature adipocytes which is strongly  
243 dependent on the presence of irisin but not prominently on its presumed integrin receptor.

### 244 **3.4 Irisin stimulates the release of CXCL1 via the upregulation of NFκB pathway**

245 Next, we aimed to investigate the molecular mechanisms underlying the irisin-induced CXCL1  
246 release. According to our RNA Sequencing data, irisin treatment resulted in a significant  
247 upregulation of *NFKB2* and an increasing trend was observed for *NFKB1* and *RELA* (Supplementary  
248 figure 5A-C) genes. RT-qPCR validation indicated significant upregulation of *NFKB1* (p50 subunit)  
249 and *RELA* (p65 subunit) in DN, while an increasing trend was observed in SC adipocytes (Figure 5A-  
250 B). p50 protein expression was significantly increased in DN and an increasing trend was found in  
251 the case of SC adipocytes (Figure 5C). Protein expression of I $\kappa$ B $\alpha$ , the inhibitor of NF $\kappa$ B  
252 transcription factor, decreased significantly upon irisin treatment in SC and a decreasing trend was  
253 observed in DN adipocytes (Figure 5D), indicating the upregulation of NF $\kappa$ B pathway.

254 To prove the direct involvement of the NF $\kappa$ B pathway in adipocyte response to irisin, we applied a  
255 cell permeable inhibitor of NF $\kappa$ B nuclear translocation, SN50 (31), which significantly reduced the  
256 release of the chemokine from both types of adipocytes, when it was applied on top of irisin on both  
257 the fourth and twelfth days of differentiation, as compared to cells stimulated only by irisin (Figure  
258 5E).

259 The observed effects of irisin are not likely to be caused by any contamination of endotoxins, which  
260 is proved by the negligible expression of *TNF $\alpha$*  or *CCL3* genes (Supplementary figure 5D,E), and the  
261 decreasing trend of *IL1 $\beta$*  gene expression (Supplementary figure 5F) in irisin treated adipocytes.  
262 Furthermore, we did not detect secreted TNF $\alpha$  or IL-1 $\beta$  in the conditioned media of either untreated  
263 or irisin treated SC and DN derived adipocytes (data not shown).

### 264 **3.5 CXCL1 released from irisin stimulated adipocytes and adipose tissue improves the** 265 **adhesion of endothelial cells**

266 Finally, SC and DN paired tissue biopsies were floated in the presence or absence of irisin dissolved  
267 in empty media, followed by quantification of CXCL1 release. The secretion of the chemokine was  
268 significantly stimulated from DN tissue biopsies upon irisin treatment (Figure 6A).

269 Secretion of CXCL1 plays an important role in wound repair and angiogenesis (28). To prove  
270 whether the released CXCL1 can lead to increased adhesion of endothelial cells, conditioned media  
271 collected on the twelfth day of *ex vivo* differentiation, from untreated and irisin treated SC and DN  
272 area adipocytes, were added to HUVECs followed by a resorufin based adhesion assay. The  
273 conditioned medium from irisin treated adipocytes, which contains various released factors  
274 (including CXCL1) was able to significantly increase the adhesion of HUVECs, compared to the  
275 conditioned medium of untreated adipocytes (Figure 6B,C). When HUVECs were treated with  
276 recombinant CXCL1, at the highest observed concentration in media of irisin-treated *ex vivo*  
277 differentiated adipocytes, their adhesion was enhanced significantly (Figure 6D). This suggests a  
278 potential beneficial role of the released CXCL1 in promoting endothelial functions and adipose tissue  
279 remodelling to support efficient thermogenesis indirectly by enhancing vascularisation.

## 280 **4 Discussion**

281 Primarily, irisin was discovered as a proteolytic product of FNDC5, released by cardiac and skeletal  
282 myocytes, which induces a beige differentiation program in mouse subcutaneous WAT (19), (38). In  
283 humans, Adenine was replaced by Guanine in the start codon of the murine FNDC5 gene, probably  
284 resulting in a shorter precursor protein lacking the part from which irisin is cleaved (22). Despite this,  
285 the presence of irisin in human blood plasma could be detected using mass spectrometry or different  
286 antibodies, however, in a more than 10-fold lower concentration than in rodents (39). Furthermore, it  
287 is present in the cerebrospinal fluid, liver, pancreas, stomach, saliva, and urine (40). Controversial

288 effects were observed when differentiating human adipocytes of distinct anatomical origins were  
289 treated with the recombinant hormone (21), (22), (23), (24), (25), (26), (41). We reported that irisin  
290 induced a beige phenotype of human primary abdominal subcutaneous and Simpson-Golabi-Behmel  
291 syndrome (SGBS) adipocytes when they were treated at a concentration detected in physically active  
292 rodents on top the white adipogenic protocol that was used in this study (26), (25). Irisin  
293 administration also facilitated the secretion of batokines, such as IL-6 and MCP1, by abdominal  
294 subcutaneous and neck area adipocytes (27).

295 Adipocytes from the neck, especially the DN, area play a significant role in maintaining whole body  
296 energy homeostasis by performing continuous non-shivering thermogenesis (42), (43), (44), (45).  
297 However, the effect of irisin during the differentiation of SC and DN area adipocytes has not yet been  
298 elucidated. Recent publications pointed out that irisin may induce a different degree of browning  
299 response based on the origin of the human adipose tissue (21), (46). According to our results  
300 presented here, irisin did not directly influence the expression of thermogenesis-related genes in the  
301 SC and DN area adipocytes. However, it induced components of a secretory pathway leading to the  
302 release of *CXCL1*.

303 The targeted genetic impairment of the thermogenic capacity of BAT in mice (e.g. *Ucp1*<sup>-/-</sup> mice)  
304 results in a less pronounced phenotype than the ablation of BAT (17). Transplantation of small  
305 amounts of BAT or activated beige adipocytes leads to significant effects on systemic metabolism,  
306 including increased glucose tolerance or attenuated fat accumulation in the liver in response to an  
307 obesogenic diet (47). Further studies highlighted the important secretory role of BAT, leading to an  
308 increased interest in identifying batokines in rodents that can exert autocrine, paracrine or endocrine  
309 effects. Several recently discovered batokines, such as FGF21, NRG4, BMP8b, *CXCL14*, or  
310 adiponectin have been shown to exert a protective role against obesity by enhancing beiging of  
311 WAT, lipolysis, sympathetic innervation, or polarization of M2 macrophages (16). We found that IL-  
312 6, released as a batokine, directly improves browning of human abdominal subcutaneous adipocytes  
313 (27). Our findings suggest that *CXCL1* is a novel batokine, which can be secreted in response to  
314 specific cues. This is further supported by gene expression data from single cell analysis of human  
315 subcutaneous adipocytes; in thermogenic cells, genes of *CXCL1*, and other secreted factors, such as  
316 *CXCL2*, *CXCL3*, *CXCL5*, *CCL2*, and *IL6*, were significantly upregulated in response to forskolin that  
317 models adrenergic stimulation of heat production (48).

318 *CXCL1* is a small peptide belonging to the CXC chemokine family. Upon binding to its receptor,  
319 *CXCR2* (49), it acts as a chemoattractant of several immune cells, especially neutrophils (50).  
320 *CXCL1* initiates the migration of immune and endothelial cells upon injury-mediated tissue repair  
321 (28). Conditioned medium containing *CXCL1*, collected during differentiation of SC and DN  
322 adipocytes in the presence of irisin, significantly improved the adhesion of HUVECs. We observed  
323 the similar response when they were directly treated with the recombinant chemokine (Figure 6D).  
324 Together this indicated a beneficial paracrine role of the released *CXCL1* from differentiating  
325 adipocytes upon irisin treatment.

326 Our study shed light on an important role of irisin, as a regulator of batokine release from  
327 differentiating adipocytes of the neck area. The study also indicated the upregulation of various other  
328 cytokines, such as *CX3CL1*, *IL32*, *CXCL2*, *IL34*, *CXCL5*, and *CXCL3*. Further studies are required to  
329 reveal the impact of irisin stimulated release of other cytokines, which may have beneficial effects on  
330 local tissue homeostasis or metabolic parameters of the entire body.



331 Irisin can exert non-thermogenic effects on several tissues, including the liver (51), central nervous  
332 system (52), (53), blood vessels (54), or the heart (55). In mouse osteocytes, irisin acts via a subset of  
333 integrin receptor complexes, which are assembled from ITGAV and either ITGB1, ITGB3, or ITGB5  
334 (20). These integrins transmit the effect of irisin in inguinal fat and osteoclasts *in vivo* (20), (56). In  
335 our experiments, RT-qPCR analysis of *ITGAV* expression has revealed its high expression in both  
336 preadipocytes and differentiated adipocytes, which was further upregulated upon irisin treatment  
337 (Figure 1D). RNA Sequencing also proved that the  $\beta$ -integrin subunits were abundantly expressed in  
338 both preadipocytes and differentiated adipocytes (Supplementary figure 1). However, RGDS peptide  
339 exerted only a moderate effect on the irisin-stimulated CXCL1 secretion. This suggests that irisin  
340 initiates some of its biological effects via other, currently unknown receptor(s) as well. The canonical  
341 integrin signaling includes the phosphorylation of FAK and Zyxin, followed by phosphorylation of  
342 AKT (at T308) and CREB (20). However, other studies proposed positive effects of irisin on cAMP-  
343 PKA-HSL (57), AMPK (58), (59), or p38 MAPK (18) pathways. Of note, RGDS peptide was applied  
344 at a relatively low concentration, in which anoikis was not observed. It is still possible that some of  
345 the administered irisin still access their integrin receptors at this condition.

346 It has already been reported that *CXCL1* gene expression is directly controlled by NF $\kappa$ B (60). NF $\kappa$ B-  
347 signaling might be induced in *ex vivo* differentiated adipocytes by released saturated fatty acids that  
348 can activate toll-like receptor (TLR) 4, which is abundantly expressed at mRNA level in hASCs and  
349 adipocytes of human neck (data not shown) (61), (62). Our data indicate that genes of canonical  
350 NF $\kappa$ B-signaling, which are abundantly expressed in neck area adipocytes, are upregulated when  
351 differentiated in the presence of irisin (Figure 5A,B). The absence of TNF $\alpha$  or IL-1 $\beta$ -upregulation  
352 and release during the differentiation in the presence of irisin excluded the possibility of endotoxin  
353 contamination of the recombinant hormone. Although, irisin was reported previously to inhibit LPS-  
354 induced NF $\kappa$ B activation (63), (64), adipocytes differentiated in the presence of both SN50 and irisin  
355 released less CXCL1 than those of treated with irisin alone (Figure 5E). Further research is needed to  
356 explore the irisin-induced molecular events in the distinct human adipocyte subsets.

## 357 **5 Conflict of Interest**

358 Authors declare no conflict of interest.

## 359 **6 Author Contributions**

360 LF, EK, AS and RK conceived and designed the experiments. AS, EK, SP, RK, and AV performed  
361 the experiments. EK, AS, and AV generated primary cell cultures for the experiments. BBT analysed  
362 the RNAseq data. AR analysed and visualized gene interaction networks. ICs, AS, AV, and ZsB  
363 performed microscopy and image analysis. FGy provided tissue samples, IRK-Sz provided HUVEC  
364 cells. AS and EK wrote the manuscript with inputs from BBT. LF mentored the writing and revised  
365 the draft. LF, EK, and IRK-Sz acquired funding. All authors approved the submitted version.

## 366 **7 Funding**

367 This research was funded by the European Union and the European Regional Development Fund  
368 (GINOP-2.3.2-15-2016-00006) and the National Research, Development and Innovation Office  
369 (NKFIH-FK131424, K129139, and K120392) of Hungary. EK was supported by the János Bolyai  
370 Fellowship of the Hungarian Academy of Sciences and the ÚNKP-20-5 New National Excellence  
371 Program of the Ministry for Innovation and Technology from the source of the National Research,  
372 Development and Innovation Fund.

## 373 **8 List of non-standard abbreviations**

374 Brown adipose tissue (BAT)  
375 Deep-neck derived adipocytes (DN)  
376 Growth-related oncogene (GRO)  
377 Human adipose-derived stromal cells (hASCs)  
378 Human Umbilical Vein Endothelial Cells (HUVEC)  
379 Immunoglobulin G (IgG)  
380 Interleukin (IL)  
381 Monocyte chemoattractant protein 1 (MCP1)  
382 Nuclear factor- $\kappa$ B (NF $\kappa$ B)  
383 Propidium iodide (PI)  
384 Subcutaneous neck derived adipocytes (SC)  
385 White adipose tissue (WAT)

## 386 **9 Acknowledgments**

387 We thank Jennifer Nagy for technical assistance and Dr. Zsuzsa Szondy for reviewing the  
388 manuscript.

## 389 **10 Ethics statement**

390 The study protocol has been approved by Medical Research Council of Hungary (20571-  
391 2/2017/EKU). Experiments were performed strictly in accordance with the approved ethical  
392 regulations and guidelines.

## 393 **11 References**

- 394 1. Cypess AM, Lehman S, Williams G, Tal I, Rodman D, Goldfine AB, et al. Identification and  
395 importance of brown adipose tissue in adult humans. *N Engl J Med*. 2009;360(15):1509-17.
- 396 2. Leitner BP, Huang S, Brychta RJ, Duckworth CJ, Baskin AS, McGehee S, et al. Mapping of  
397 human brown adipose tissue in lean and obese young men. *Proc Natl Acad Sci U S A*.  
398 2017;114(32):8649-54.
- 399 3. van Marken Lichtenbelt WD, Vanhomerig JW, Smulders NM, Drossaerts JM, Kemerink  
400 GJ, Bouvy ND, et al. Cold-activated brown adipose tissue in healthy men. *N Engl J Med*.  
401 2009;360(15):1500-8.
- 402 4. Virtanen KA, Lidell ME, Orava J, Heglind M, Westergren R, Niemi T, et al. Functional  
403 brown adipose tissue in healthy adults. *N Engl J Med*. 2009;360(15):1518-25.
- 404 5. Saito M, Okamatsu-Ogura Y, Matsushita M, Watanabe K, Yoneshiro T, Nio-Kobayashi J, et  
405 al. High incidence of metabolically active brown adipose tissue in healthy adult humans: effects of  
406 cold exposure and adiposity. *Diabetes*. 2009;58(7):1526-31.
- 407 6. van Marken Lichtenbelt WD, Schrauwen P. Implications of nonshivering thermogenesis for  
408 energy balance regulation in humans. *Am J Physiol Regul Integr Comp Physiol*. 2011;301(2):R285-  
409 96.
- 410 7. Kajimura S, Spiegelman BM, Seale P. Brown and Beige Fat: Physiological Roles beyond  
411 Heat Generation. *Cell Metab*. 2015;22(4):546-59.
- 412 8. Rosen ED, Spiegelman BM. What we talk about when we talk about fat. *Cell*. 2014;156(1-  
413 2):20-44.
- 414 9. Villarroya F, Cereijo R, Villarroya J, Giralt M. Brown adipose tissue as a secretory organ. *Nat*  
415 *Rev Endocrinol*. 2017;13(1):26-35.

- 416 10. Mahdavian K, Chess D, Wu Y, Shirihai O, Aprahamian TR. Autocrine effect of vascular  
417 endothelial growth factor-A is essential for mitochondrial function in brown adipocytes. *Metabolism*.  
418 2016;65(1):26-35.
- 419 11. Sun K, Kusminski CM, Luby-Phelps K, Spurgin SB, An YA, Wang QA, et al. Brown adipose  
420 tissue derived VEGF-A modulates cold tolerance and energy expenditure. *Mol Metab*.  
421 2014;3(4):474-83.
- 422 12. Xue Y, Petrovic N, Cao R, Larsson O, Lim S, Chen S, et al. Hypoxia-independent  
423 angiogenesis in adipose tissues during cold acclimation. *Cell Metab*. 2009;9(1):99-109.
- 424 13. Ruan CC, Kong LR, Chen XH, Ma Y, Pan XX, Zhang ZB, et al. A2A receptor activation  
425 attenuates hypertensive cardiac remodeling via promoting brown adipose tissue-derived FGF21. *Cell*  
426 *Metab*. 2018;28(3):476-89.e5.
- 427 14. Hondares E, Iglesias R, Giralt A, Gonzalez FJ, Giralt M, Mampel T, et al. Thermogenic  
428 activation induces FGF21 expression and release in brown adipose tissue. *J Biol Chem*.  
429 2011;286(15):12983-90.
- 430 15. Wang QA, Tao C, Jiang L, Shao M, Ye R, Zhu Y, et al. Distinct regulatory mechanisms  
431 governing embryonic versus adult adipocyte maturation. *Nat Cell Biol*. 2015;17(9):1099-111.
- 432 16. Ahmad B, Vohra MS, Saleemi MA, Serpell CJ, Fong IL, Wong EH. Brown/Beige adipose  
433 tissues and the emerging role of their secretory factors in improving metabolic health: The batokines.  
434 *Biochimie*. 2021;184:26-39.
- 435 17. Villarroya J, Cereijo R, Gavaldà-Navarro A, Peyrou M, Giralt M, Villarroya F. New insights  
436 into the secretory functions of brown adipose tissue. *J Endocrinol*. 2019;243(2):R19-R27.
- 437 18. Zhang Y, Li R, Meng Y, Li S, Donelan W, Zhao Y, et al. Irisin stimulates browning of white  
438 adipocytes through mitogen-activated protein kinase p38 MAP kinase and ERK MAP kinase  
439 signaling. *Diabetes*. 2014;63(2):514-25.
- 440 19. Boström P, Wu J, Jedrychowski MP, Korde A, Ye L, Lo JC, et al. A PGC1- $\alpha$ -dependent  
441 myokine that drives brown-fat-like development of white fat and thermogenesis. *Nature*.  
442 2012;481(7382):463-8.
- 443 20. Kim H, Wrann CD, Jedrychowski M, Vidoni S, Kitase Y, Nagano K, et al. Irisin Mediates  
444 Effects on Bone and Fat via  $\alpha$ V Integrin Receptors. *Cell*. 2018;175(7):1756-68.e17.
- 445 21. Li H, Zhang Y, Wang F, Donelan W, Zona MC, Li S, et al. Effects of irisin on the  
446 differentiation and browning of human visceral white adipocytes. *Am J Transl Res*.  
447 2019;11(12):7410-21.
- 448 22. Raschke S, Elsen M, Gassenhuber H, Sommerfeld M, Schwahn U, Brockmann B, et al.  
449 Evidence against a beneficial effect of irisin in humans. *PLoS One*. 2013;8(9):e73680.
- 450 23. Lee P, Linderman JD, Smith S, Brychta RJ, Wang J, Idelson C, et al. Irisin and FGF21 are  
451 cold-induced endocrine activators of brown fat function in humans. *Cell Metab*. 2014;19(2):302-9.
- 452 24. Silva FJ, Holt DJ, Vargas V, Yockman J, Boudina S, Atkinson D, et al. Metabolically active  
453 human brown adipose tissue derived stem cells. *Stem Cells*. 2014;32(2):572-81.
- 454 25. Kristóf E, Doan-Xuan QM, Bai P, Bacso Z, Fésüs L. Laser-scanning cytometry can quantify  
455 human adipocyte browning and proves effectiveness of irisin. *Sci Rep*. 2015;5:12540.
- 456 26. Klusóczki Á, Veréb Z, Vámos A, Fischer-Posovszky P, Wabitsch M, Bacso Z, et al.  
457 Differentiating SGBS adipocytes respond to PPAR $\gamma$  stimulation, irisin and BMP7 by functional  
458 browning and beige characteristics. *Sci Rep*. 2019;9(1):5823.
- 459 27. Kristóf E, Klusóczki Á, Veress R, Shaw A, Combi ZS, Varga K, et al. Interleukin-6 released  
460 from differentiating human beige adipocytes improves browning. *Exp Cell Res*. 2019;377(1-2):47-  
461 55.
- 462 28. Gillitzer R, Goebeler M. Chemokines in cutaneous wound healing. *J Leukoc Biol*.  
463 2001;69(4):513-21.

- 464 29. Tóth BB, Arianti R, Shaw A, Vámos A, Veréb Z, Póliska S, et al. FTO Intronic SNP Strongly  
465 Influences Human Neck Adipocyte Browning Determined by Tissue and PPAR $\gamma$  Specific  
466 Regulation: A Transcriptome Analysis. *Cells*. 2020;9(4).
- 467 30. Fischer-Posovszky P, Newell FS, Wabitsch M, Tornqvist HE. Human SGBS cells - a unique  
468 tool for studies of human fat cell biology. *Obes Facts*. 2008;1(4):184-9.
- 469 31. Sárvári AK, Doan-Xuan QM, Bacsó Z, Csomós I, Balajthy Z, Fésüs L. Interaction of  
470 differentiated human adipocytes with macrophages leads to trogocytosis and selective IL-6 secretion.  
471 *Cell Death Dis*. 2015;6:e1613.
- 472 32. Szatmári-Tóth M, Shaw A, Csomós I, Mocsár G, Fischer-Posovszky P, Wabitsch M, et al.  
473 Thermogenic Activation Downregulates High Mitophagy Rate in Human Masked and Mature Beige  
474 Adipocytes. *Int J Mol Sci*. 2020;21(18).
- 475 33. Doan-Xuan QM, Sarvari AK, Fischer-Posovszky P, Wabitsch M, Balajthy Z, Fesus L, et al.  
476 High content analysis of differentiation and cell death in human adipocytes. *Cytometry A*.  
477 2013;83(10):933-43.
- 478 34. Ballak DB, Stienstra R, Hijmans A, Joosten LA, Netea MG, Tack CJ. Combined B- and T-  
479 cell deficiency does not protect against obesity-induced glucose intolerance and inflammation.  
480 *Cytokine*. 2013;62(1):96-103.
- 481 35. Palatka K, Serfozo Z, Veréb Z, Bátorfi R, Lontay B, Hargitay Z, et al. Effect of IBD sera on  
482 expression of inducible and endothelial nitric oxide synthase in human umbilical vein endothelial  
483 cells. *World J Gastroenterol*. 2006;12(11):1730-8.
- 484 36. Counter CM, Hahn WC, Wei W, Caddle SD, Beijersbergen RL, Lansdorp PM, et al.  
485 Dissociation among in vitro telomerase activity, telomere maintenance, and cellular immortalization.  
486 *Proc Natl Acad Sci U S A*. 1998;95(25):14723-8.
- 487 37. Stewart SA, Dykxhoorn DM, Palliser D, Mizuno H, Yu EY, An DS, et al. Lentivirus-  
488 delivered stable gene silencing by RNAi in primary cells. *RNA*. 2003;9(4):493-501.
- 489 38. Aydin S, Kuloglu T, Eren MN, Celik A, Yilmaz M, Kalayci M, et al. Cardiac, skeletal muscle  
490 and serum irisin responses to with or without water exercise in young and old male rats: cardiac  
491 muscle produces more irisin than skeletal muscle. *Peptides*. 2014;52:68-73.
- 492 39. Jedrychowski MP, Wrann CD, Paulo JA, Gerber KK, Szpyt J, Robinson MM, et al. Detection  
493 and Quantitation of Circulating Human Irisin by Tandem Mass Spectrometry. *Cell Metab*.  
494 2015;22(4):734-40.
- 495 40. Mahgoub MO, D'Souza C, Al Darmaki RSMH, Baniyas MMYH, Adeghate E. An update on  
496 the role of irisin in the regulation of endocrine and metabolic functions. *Peptides*. 2018;104:15-23.
- 497 41. Li H, Wang F, Yang M, Sun J, Zhao Y, Tang D. The Effect of Irisin as a Metabolic Regulator  
498 and Its Therapeutic Potential for Obesity. *Int J Endocrinol*. 2021;2021:6572342.
- 499 42. Svensson PA, Jernås M, Sjöholm K, Hoffmann JM, Nilsson BE, Hansson M, et al. Gene  
500 expression in human brown adipose tissue. *Int J Mol Med*. 2011;27(2):227-32.
- 501 43. Cypess AM, White AP, Vernochet C, Schulz TJ, Xue R, Sass CA, et al. Anatomical  
502 localization, gene expression profiling and functional characterization of adult human neck brown  
503 fat. *Nat Med*. 2013;19(5):635-9.
- 504 44. Wu J, Boström P, Sparks LM, Ye L, Choi JH, Giang AH, et al. Beige adipocytes are a distinct  
505 type of thermogenic fat cell in mouse and human. *Cell*. 2012;150(2):366-76.
- 506 45. Jespersen NZ, Larsen TJ, Peijs L, Dugaard S, Homøe P, Loft A, et al. A classical brown  
507 adipose tissue mRNA signature partly overlaps with brite in the supraclavicular region of adult  
508 humans. *Cell Metab*. 2013;17(5):798-805.
- 509 46. Buscemi S, Corleo D, Buscemi C, Giordano C. Does irisin bring bad news or good news?  
510 *Eat Weight Disord*. 2018;23(4):431-42.

- 511 47. Min SY, Kady J, Nam M, Rojas-Rodriguez R, Berkenwald A, Kim JH, et al. Human  
512 'brite/beige' adipocytes develop from capillary networks, and their implantation improves metabolic  
513 homeostasis in mice. *Nat Med*. 2016;22(3):312-8.
- 514 48. Min SY, Desai A, Yang Z, Sharma A, DeSouza T, Genga RMJ, et al. Diverse repertoire of  
515 human adipocyte subtypes develops from transcriptionally distinct mesenchymal progenitor cells.  
516 *Proc Natl Acad Sci U S A*. 2019;116(36):17970-9.
- 517 49. Silva RL, Lopes AH, Guimarães RM, Cunha TM. CXCL1/CXCR2 signaling in pathological  
518 pain: Role in peripheral and central sensitization. *Neurobiol Dis*. 2017;105:109-16.
- 519 50. Schumacher C, Clark-Lewis I, Baggiolini M, Moser B. High- and low-affinity binding of  
520 GRO alpha and neutrophil-activating peptide 2 to interleukin 8 receptors on human neutrophils. *Proc*  
521 *Natl Acad Sci U S A*. 1992;89(21):10542-6.
- 522 51. Tang H, Yu R, Liu S, Huwatibieke B, Li Z, Zhang W. Irisin Inhibits Hepatic Cholesterol  
523 Synthesis via AMPK-SREBP2 Signaling. *EBioMedicine*. 2016;6:139-48.
- 524 52. Ferrante C, Orlando G, Recinella L, Leone S, Chiavaroli A, Di Nisio C, et al. Central  
525 inhibitory effects on feeding induced by the adipo-myokine irisin. *Eur J Pharmacol*. 2016;791:389-  
526 94.
- 527 53. Zsuga J, More CE, Erdei T, Papp C, Harsanyi S, Gesztelyi R. Blind Spot for Sedentarism:  
528 Redefining the Disease of Physical Inactivity in View of Circadian System and the Irisin/BDNF  
529 Axis. *Front Neurol*. 2018;9:818.
- 530 54. Han F, Zhang S, Hou N, Wang D, Sun X. Irisin improves endothelial function in obese mice  
531 through the AMPK-eNOS pathway. *Am J Physiol Heart Circ Physiol*. 2015;309(9):H1501-8.
- 532 55. Xie C, Zhang Y, Tran TD, Wang H, Li S, George EV, et al. Irisin Controls Growth,  
533 Intracellular Ca<sup>2+</sup> Signals, and Mitochondrial Thermogenesis in Cardiomyoblasts. *PLoS One*.  
534 2015;10(8):e0136816.
- 535 56. Estell EG, Le PT, Vegting Y, Kim H, Wrann C, Buxsein ML, et al. Irisin directly stimulates  
536 osteoclastogenesis and bone resorption in vitro and in vivo. *Elife*. 2020;9.
- 537 57. Xiong XQ, Chen D, Sun HJ, Ding L, Wang JJ, Chen Q, et al. FNDC5 overexpression and  
538 irisin ameliorate glucose/lipid metabolic derangements and enhance lipolysis in obesity. *Biochim*  
539 *Biophys Acta*. 2015;1852(9):1867-75.
- 540 58. So WY, Leung PS. Irisin ameliorates hepatic glucose/lipid metabolism and enhances cell  
541 survival in insulin-resistant human HepG2 cells through adenosine monophosphate-activated protein  
542 kinase signaling. *Int J Biochem Cell Biol*. 2016;78:237-47.
- 543 59. Xin C, Liu J, Zhang J, Zhu D, Wang H, Xiong L, et al. Irisin improves fatty acid oxidation  
544 and glucose utilization in type 2 diabetes by regulating the AMPK signaling pathway. *Int J Obes*  
545 (Lond). 2016;40(3):443-51.
- 546 60. Burke SJ, Lu D, Sparer TE, Masi T, Goff MR, Karlstad MD, et al. NF-κB and STAT1 control  
547 CXCL1 and CXCL2 gene transcription. *Am J Physiol Endocrinol Metab*. 2014;306(2):E131-49.
- 548 61. Lee JY, Ye J, Gao Z, Youn HS, Lee WH, Zhao L, et al. Reciprocal modulation of Toll-like  
549 receptor-4 signaling pathways involving MyD88 and phosphatidylinositol 3-kinase/AKT by saturated  
550 and polyunsaturated fatty acids. *J Biol Chem*. 2003;278(39):37041-51.
- 551 62. Suganami T, Tanimoto-Koyama K, Nishida J, Itoh M, Yuan X, Mizuarai S, et al. Role of the  
552 Toll-like receptor 4/NF-κB pathway in saturated fatty acid-induced inflammatory changes in the  
553 interaction between adipocytes and macrophages. *Arterioscler Thromb Vasc Biol*. 2007;27(1):84-91.
- 554 63. Jiang X, Shen Z, Chen J, Wang C, Gao Z, Yu S, et al. Irisin Protects Against Motor  
555 Dysfunction of Rats with Spinal Cord Injury via Adenosine 5'-Monophosphate (AMP)-Activated  
556 Protein Kinase-Nuclear Factor Kappa-B Pathway. *Front Pharmacol*. 2020;11:582484.
- 557 64. Mazur-Bialy AI, Bilski J, Pochech E, Brzozowski T. New insight into the direct anti-  
558 inflammatory activity of a myokine irisin against proinflammatory activation of adipocytes.  
559 Implication for exercise in obesity. *J Physiol Pharmacol*. 2017;68(2):243-51.

560

561 **12 Supplementary Material**

562

563 **13 Data availability statement**

564 RNA-seq data was deposited to [Sequence Read Archive (SRA)] database  
 565 [<https://www.ncbi.nlm.nih.gov/sra>] under accession number PRJNA607438. Other data that support  
 566 the findings of this study are available from the corresponding authors [[fesus@med.unideb.hu](mailto:fesus@med.unideb.hu),  
 567 [kristof.endre@med.unideb.hu](mailto:kristof.endre@med.unideb.hu)] upon reasonable request.

568 **Tables**

569 **Table 1. Pathways of significantly upregulated genes upon irisin treatment during**  
 570 **differentiation of subcutaneous (SC) and deep-neck (DN) derived adipocytes.** Genes commonly  
 571 upregulated in both SC and DN area adipocytes are marked red. *CXCL1* was the highest upregulated  
 572 gene in both SC and DN area adipocytes. FDR: False Discovery Rate.

573

| SC Irisin Upregulated                      |                                                                                                               |                       |
|--------------------------------------------|---------------------------------------------------------------------------------------------------------------|-----------------------|
| Panther Reactome Pathways                  | Gene name                                                                                                     | FDR                   |
| IkBA variant leads to EDA-ID               | <i>NFKBIA, NFKB2</i>                                                                                          | 4.49x10 <sup>-2</sup> |
| Cytokine signaling in immune system        | <i>IL6, NFKBIA, JUNB, IL32, SOD2, MT2A, NFKB2, CXCL2, CCL2, IL15RA, IL18, IL34, ICAM1, CXCL1, RELB, BIRC3</i> | 5.23x10 <sup>-8</sup> |
| Interleukin-10 signaling                   | <i>IL6, CXCL2, CCL2, IL18, ICAM1, CXCL1</i>                                                                   | 1.65x10 <sup>-6</sup> |
| Class A/1 (Rhodopsin like receptors)       | <i>CXCL3, CXCL5, CX3CL1, CXCL2, CCL2, CXCL1</i>                                                               | 3.5x10 <sup>-2</sup>  |
| Interleukin-4 and Interleukin-13 signaling | <i>IL6, JUNB, CCL2, IL18, ICAM1</i>                                                                           | 2.3x10 <sup>-3</sup>  |
| DN Irisin Upregulated                      |                                                                                                               |                       |
| Panther Reactome Pathways                  | Gene name                                                                                                     | FDR                   |
| Response to metal ions                     | <i>MT2A, MT1E, MT1F</i>                                                                                       | 4.74x10 <sup>-3</sup> |

|                                            |                                                                                                                          |                       |
|--------------------------------------------|--------------------------------------------------------------------------------------------------------------------------|-----------------------|
| Class A/1 (Rhodopsin like receptors)       | <i>CCL11, CXCL3, CXCL5, CX3CL1, CXCL2, CCL2, CXCL1</i>                                                                   | $1.85 \times 10^{-2}$ |
| Cytokine signaling in immune system        | <i>IL6, CCL11, ITGB2, NFKBIA, JUNB, IL32, SOD2, MT2A, NFKB2, IL7R, CXCL2, CCL2, IL34, ICAM1, HCK, CXCL1, RELB, BIRC3</i> | $5.55 \times 10^{-8}$ |
| Interleukin-4 and Interleukin-13 signaling | <i>IL6, CCL11, ITGB2, JUNB, CCL2, ICAM1</i>                                                                              | $6.33 \times 10^{-4}$ |
| G-alpha (i) signaling events               | <i>CXCL3, CXCL5, CX3CL1, ADCY4, RGS16, CXCL2, CXCL1</i>                                                                  | $5.07 \times 10^{-2}$ |

574 **Figure legends**

575 **Figure 1. Preadipocytes from subcutaneous (SC) and deep-neck (DN) depots of human neck**  
576 **differentiated at a similar extent irrespective of the presence of irisin.** SC and DN preadipocytes  
577 (Pre) were differentiated for two weeks to white adipocytes. Where indicated, 250 ng/ml irisin was  
578 administered during the whole differentiation process. (A) Heatmap illustrating the expression of  
579 general adipogenic differentiation markers in samples used for Global RNA Sequencing (n=9), (B)  
580 Quantification of differentiation rate by laser-scanning cytometry (n=9), (C) Quantification of *ITGAV*  
581 gene expression determined by RNA Sequencing (n=9) and (D) RT-qPCR, normalized to *GAPDH*  
582 (n=5). Data presented as Mean  $\pm$  SD. \*: Refers to compared with SC,  $\Delta$ : Refers to compared with  
583 DN. \*, $\Delta$  p<0.05. Statistics: paired t-test (D).

584 **Figure 2. Irisin upregulated similar gene-sets that encode for cytokines in subcutaneous (SC)**  
585 **and deep-neck (DN) depots of human neck area adipocytes.** SC and DN preadipocytes were  
586 differentiated and treated as in Figure 1. (A) Volcano plot showing each of the upregulated genes in  
587 SC (red) and DN (blue) depots upon irisin treatment; the highest upregulated genes are listed  
588 separately, (B) Venn-diagram illustrating the genes commonly upregulated by irisin treatment in SC  
589 and DN depots. Gephi illustrations highlighting the most important pathways and the interaction of  
590 genes upregulated by irisin treatment in SC (C) and DN (D) derived adipocytes.

591 **Figure 3. Irisin dependent CXCL1 release was stimulated from differentiating subcutaneous**  
592 **(SC) and deep-neck (DN) area adipocytes.** SC and DN preadipocytes were differentiated and  
593 treated as in Figures 1-2. Where indicated, irisin was omitted from the differentiation medium at day  
594 14. Conditioned differentiation media was collected and secreted CXCL1 was measured by sandwich  
595 ELISA. (A) Quantification of *CXCL1* gene expression as determined by RNA Sequencing (n=9) or  
596 RT-qPCR (B) normalized to *GAPDH* (n=5), (C) CXCL1 release by *ex vivo* differentiating SC and  
597 DN adipocytes into the conditioned media collected at the indicated intervals, in the presence or  
598 absence of irisin (n=4), (D) CXCL1 release in conditioned medium collected at indicated intervals  
599 from untreated (21 days) and irisin treated (14 and 21 days as indicated) cell-culture samples (n=3),  
600 (E) CXCL1 release from differentiating adipocytes with or without irisin treatment, in the presence  
601 or absence of 10  $\mu$ g/ml RGDS (n=4). Comparisons are for the respective days in case of ELISA. Data  
602 presented as Mean  $\pm$  SD. \*: Refers to compared with SC,  $\Delta$ : Refers to compared with DN. \*, $\Delta$   
603 p<0.05, \*\*p<0.01. Statistics: GLM (A), One-way ANOVA with Tukey's post-test (B-E).

604 **Figure 4. Irisin stimulated CXCL1 release predominantly from subcutaneous (A) and deep-**  
605 **neck (B) area differentiated adipocytes.** SC and DN preadipocytes (Pre) were plated and

606 differentiated into adipocytes (Ad) on Ibidi chambers, with or without irisin treatment as in Figures  
607 1-3. Cells were treated with 100 ng/ml brefeldin-A for 24 hours to block the secretion of CXCL1,  
608 which was followed by fixation and image acquisition by confocal microscopy. Propidium Iodide  
609 (PI) was used to stain the nucleus. BF represents the bright field image. Confocal images of  
610 differentiated adipocytes were shown followed by wider coverage of undifferentiated and  
611 differentiated adipocytes. Scale bars represent 10  $\mu\text{m}$  for single differentiated Ad and 30  $\mu\text{m}$  for  
612 wider coverage of Pre and Ad. Yellow and green arrows point the undifferentiated preadipocytes and  
613 the differentiated adipocytes, respectively. Quantification of fluorescence intensity normalized to per  
614 cell are shown on the right bar graphs. Data presented as Mean  $\pm$  SD. n= 35 cells (A) and 50 cells (B)  
615 from two independent donors. Statistics: One-way ANOVA with Tukey's post-test.

616 **Figure 5. CXCL1 release is stimulated via the NF $\kappa$ B pathway during the differentiation of**  
617 **subcutaneous (SC) and deep-neck (DN) area adipocytes.** SC and DN preadipocytes were  
618 differentiated and treated as in Figures 1-4. Quantification of gene expression for *NFKB1* (A) and  
619 *RELA* (B), normalized to *GAPDH* by RT-qPCR (n=5), (C) p50 and IKBA (D) protein expression,  
620 normalized to  $\beta$ -actin (n=6), (E) CXCL1 release from differentiating adipocytes with or without irisin  
621 treatment, in the presence or absence of 50  $\mu\text{g}/\text{ml}$  SN50 (n=4). Data presented as Mean  $\pm$  SD. \* :  
622 Refers to compared with SC,  $\Delta$  : compared with DN, comparisons are for the respective days in case  
623 of ELISA. \* $\Delta$ p<0.05, \*\* $\Delta$ p<0.01. Statistics: One-way ANOVA with Tukey's post-test.

624 **Figure 6. Irisin stimulated the release of CXCL1 from DN tissue biopsies, which improves the**  
625 **adhesion of endothelial cells.** (A) CXCL1 released into the conditioned media of paired SC and DN  
626 biopsies after 24 hours incubation in the presence or absence of irisin (n=4), Quantification of  
627 adhesion of endothelial cells upon incubation with the conditioned media (with or without irisin  
628 treatment) from *ex vivo* differentiated (incubation period from day 8 to 12 of differentiation) SC (B)  
629 and DN (C) area adipocytes (n=5), (D) Quantification of endothelial cell adhesion upon incubation  
630 with recombinant CXCL1 in starvation medium (n=3). Data presented as Mean  $\pm$  SD. \* p<0.05,  
631 \*\*p<0.01, \*\*\*p<0.001. Statistics: One-way ANOVA with Tukey's post-test (A) and paired t-test (B-  
632 D).



**A**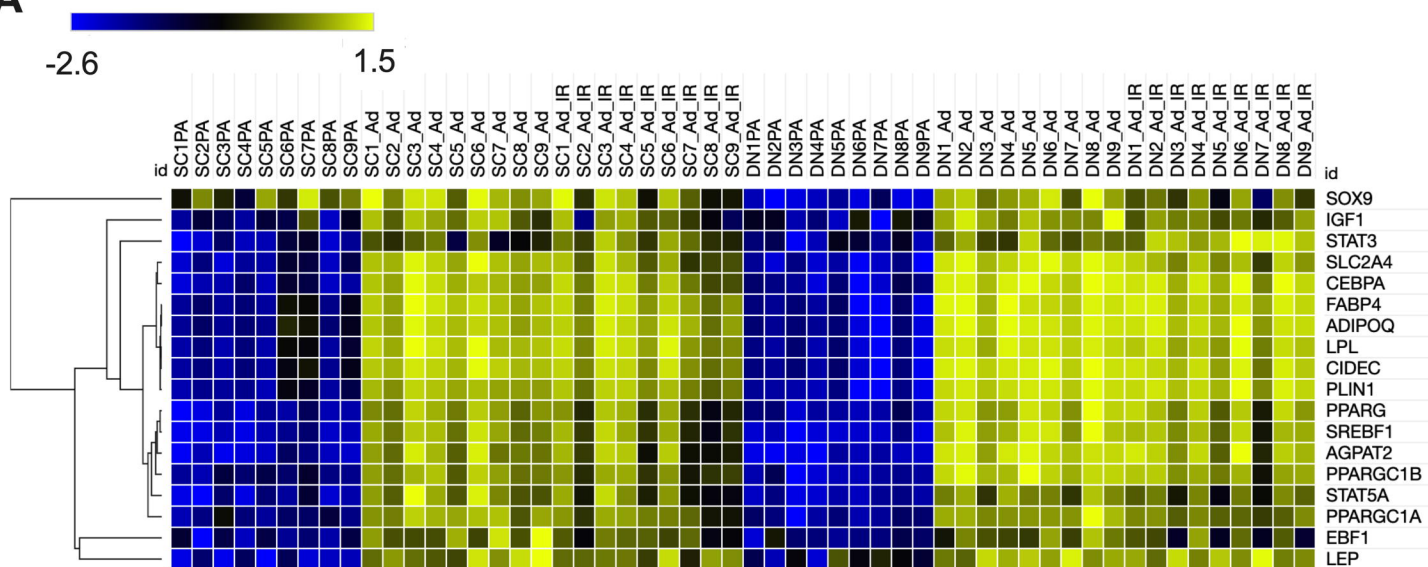**B**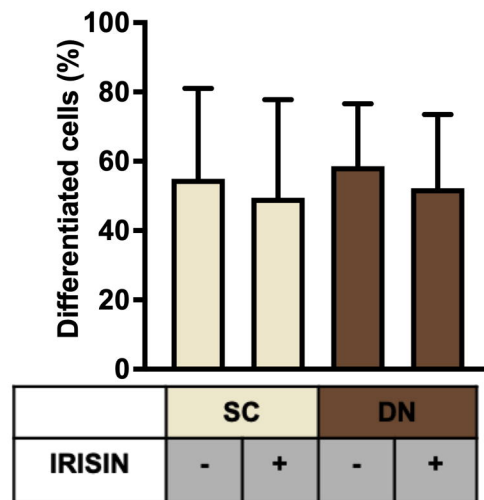**C**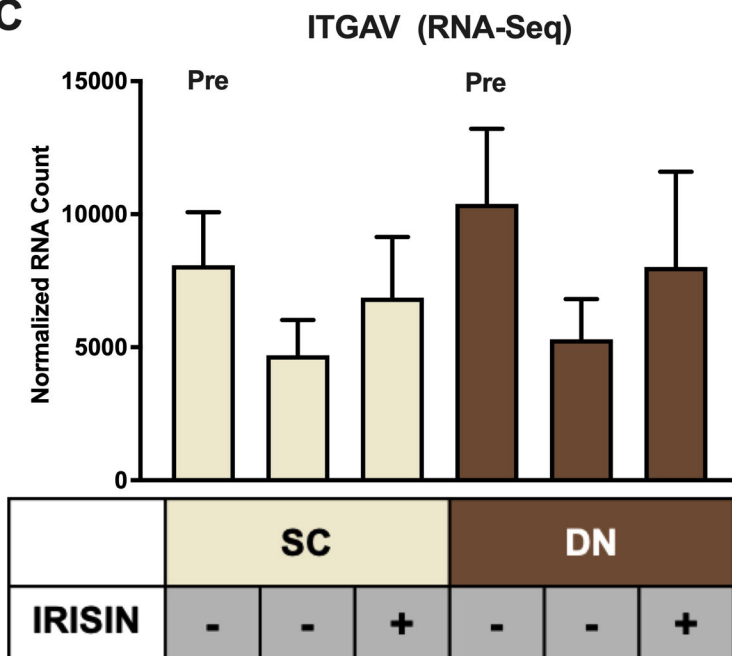**D**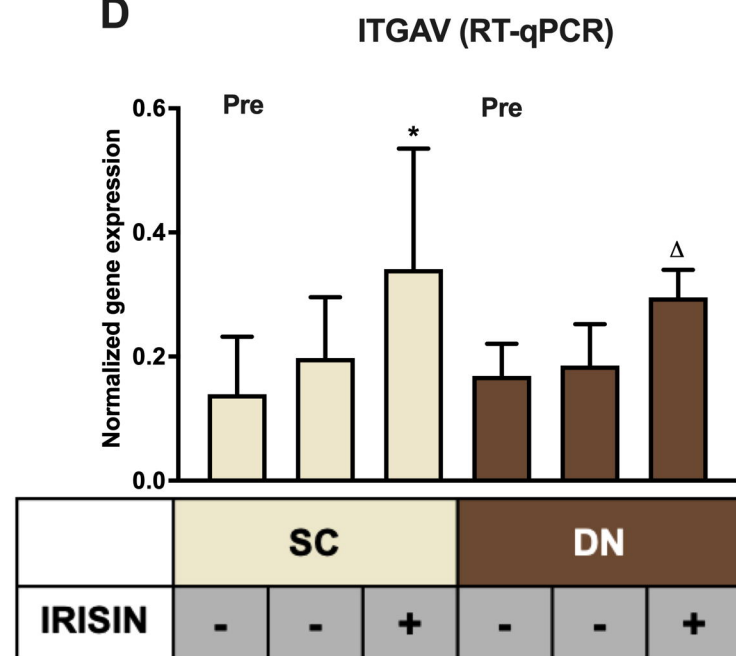

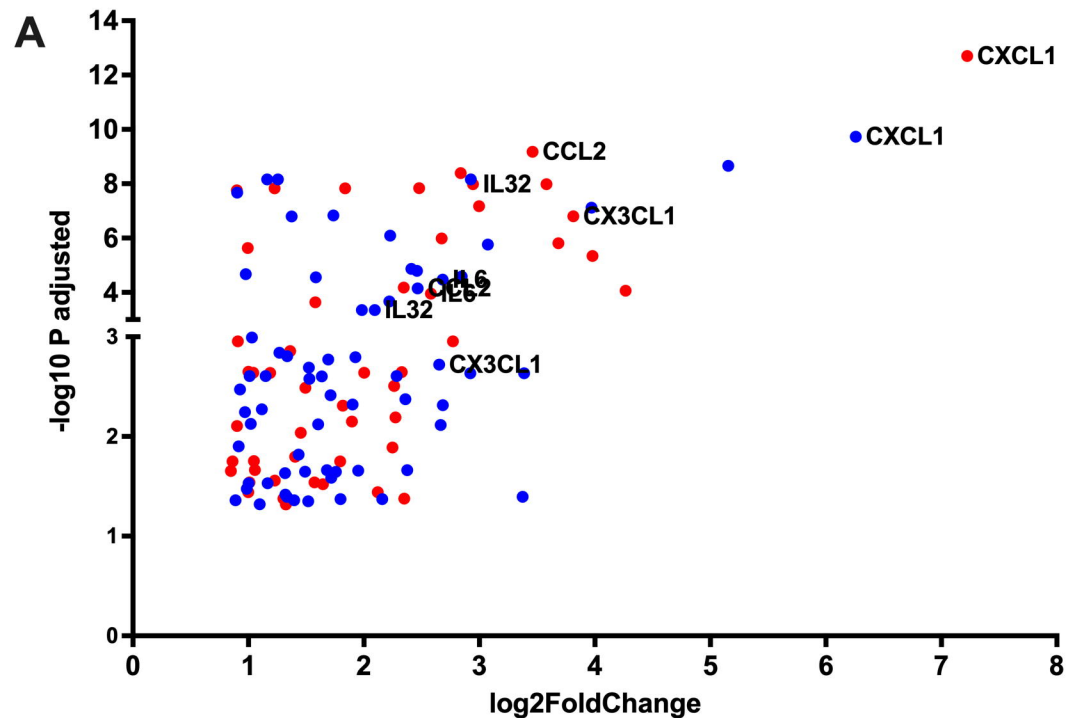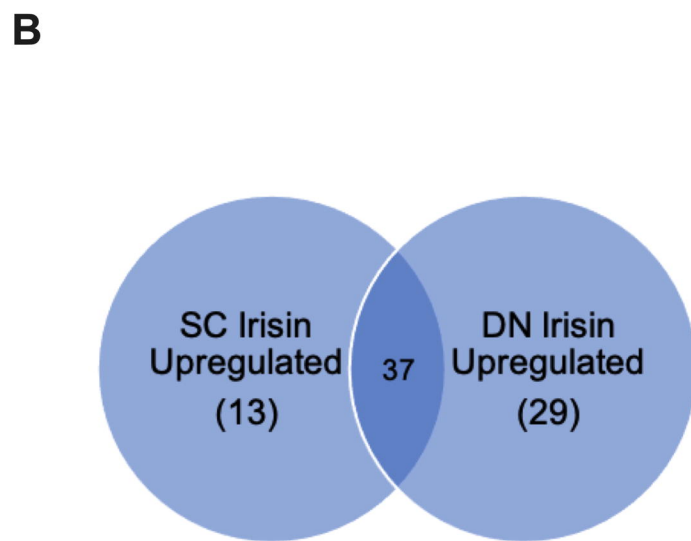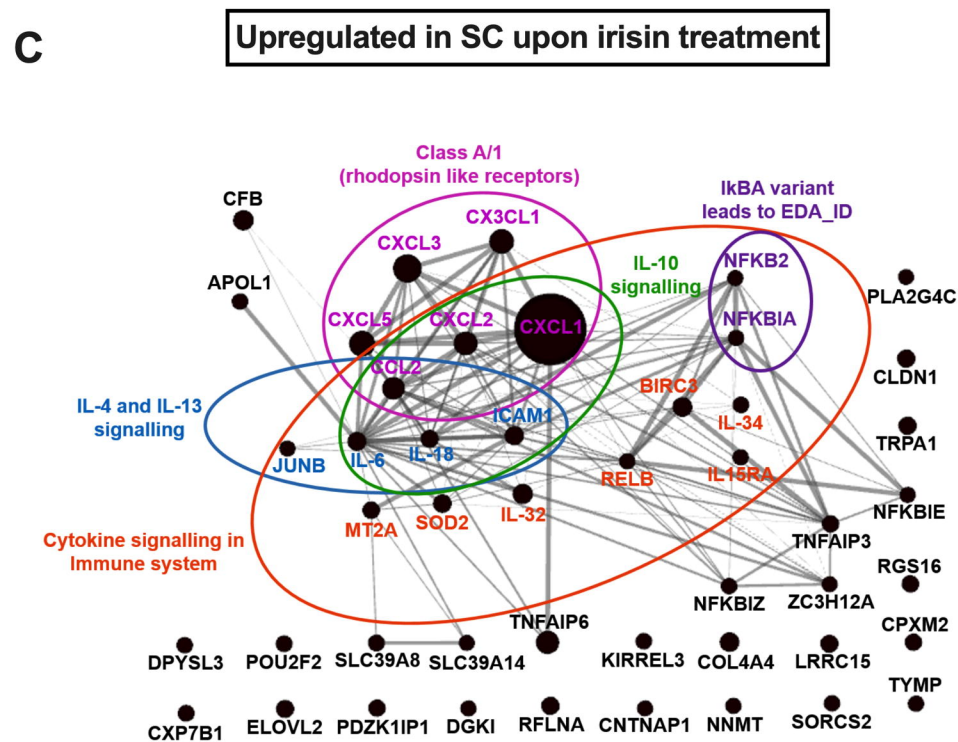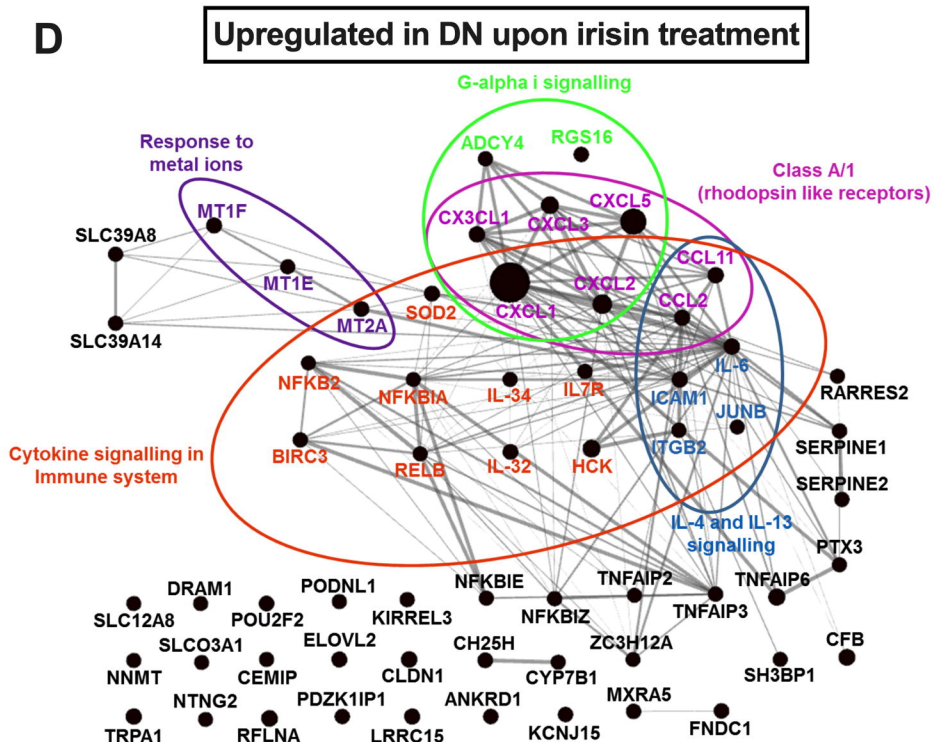

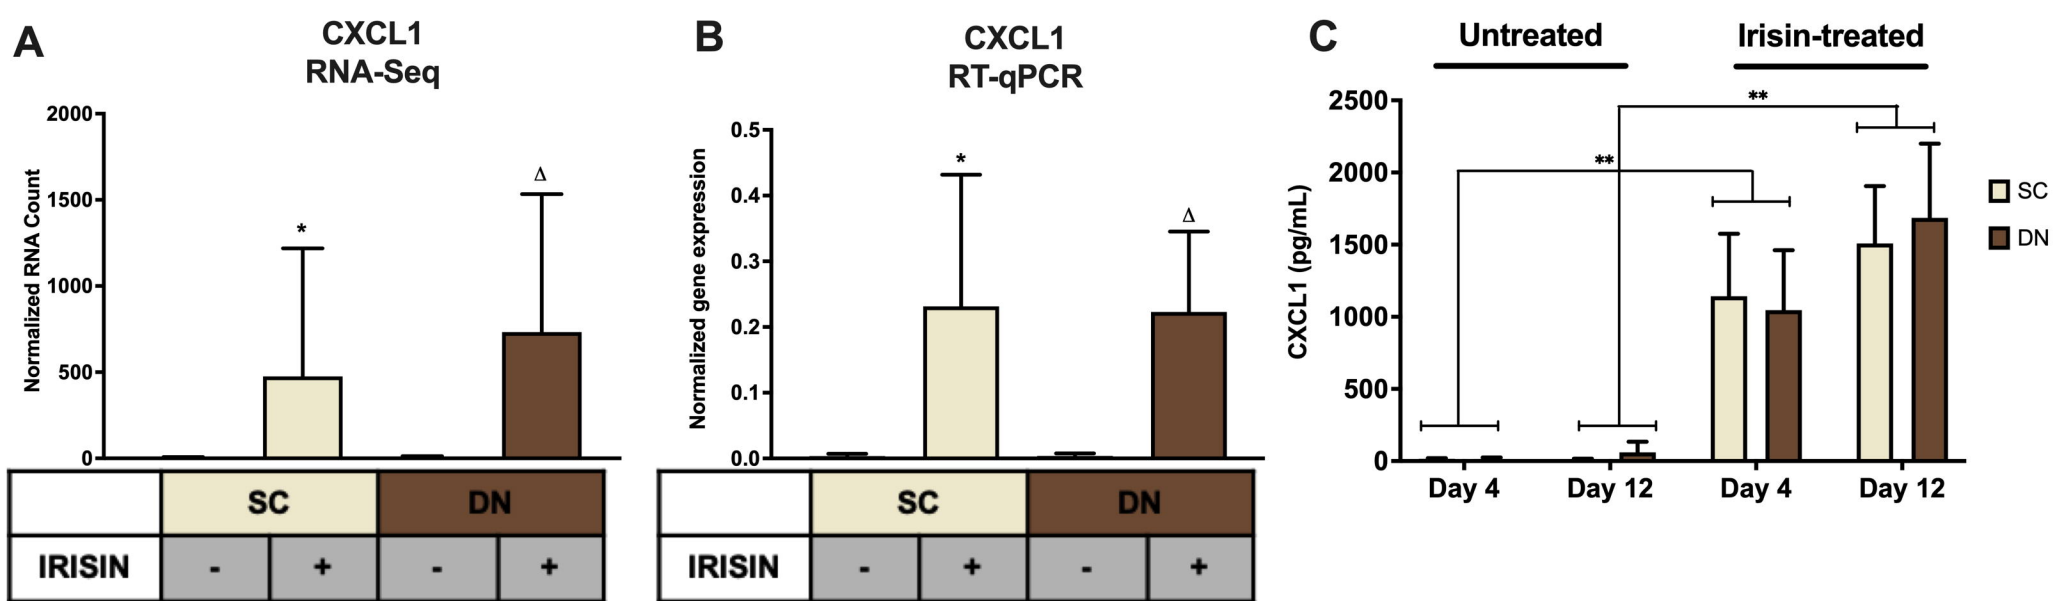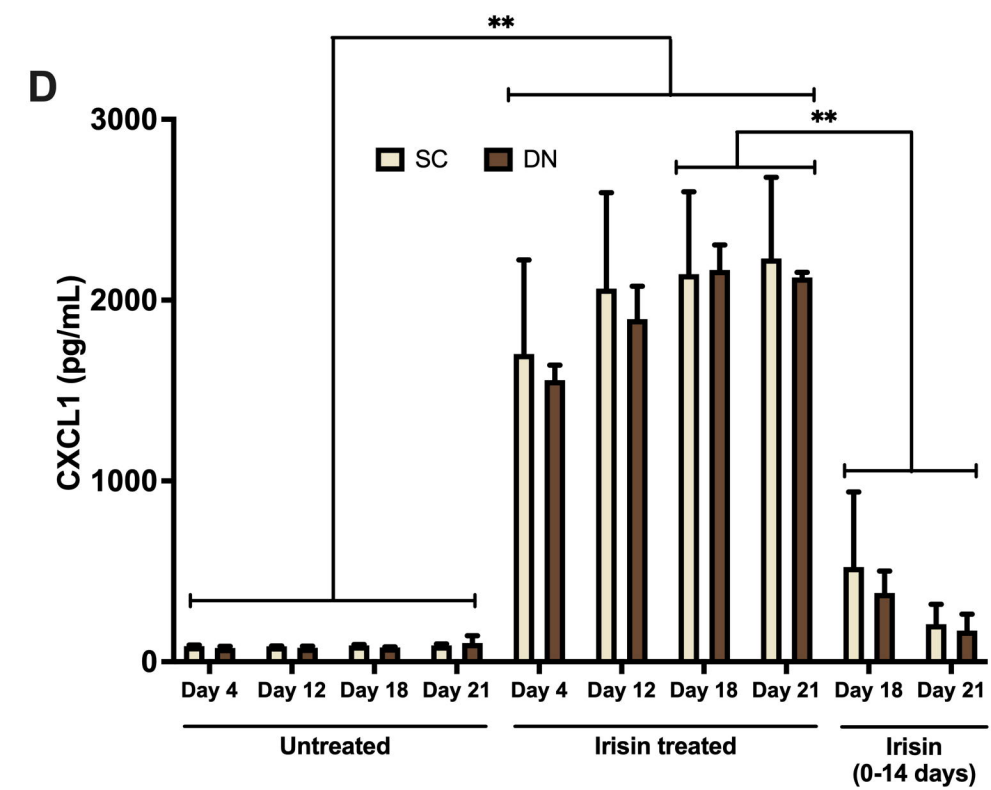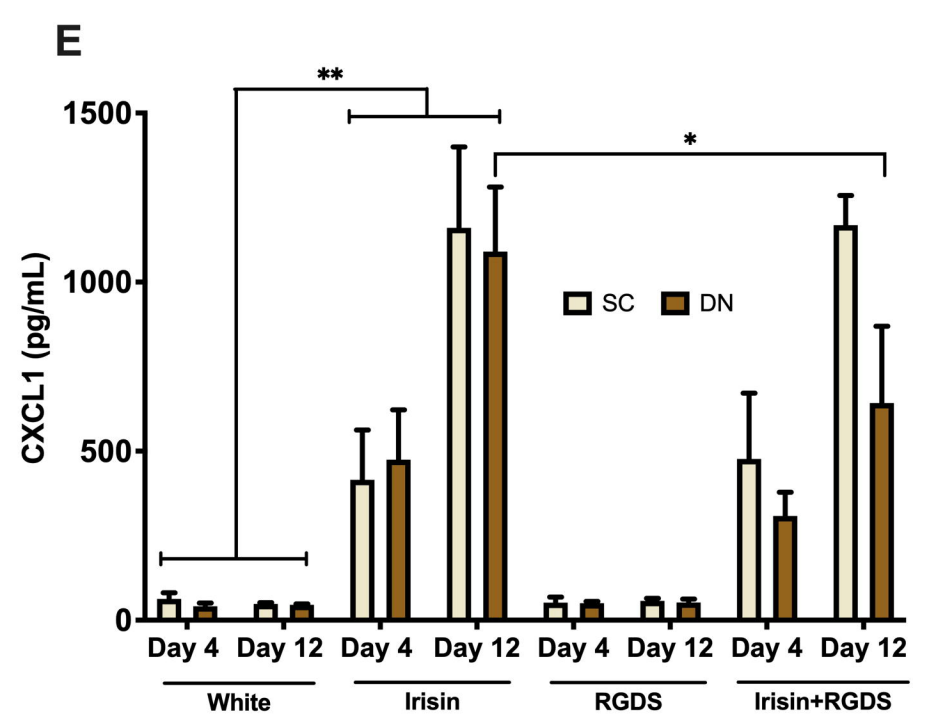

## A Subcutaneous neck area adipocytes

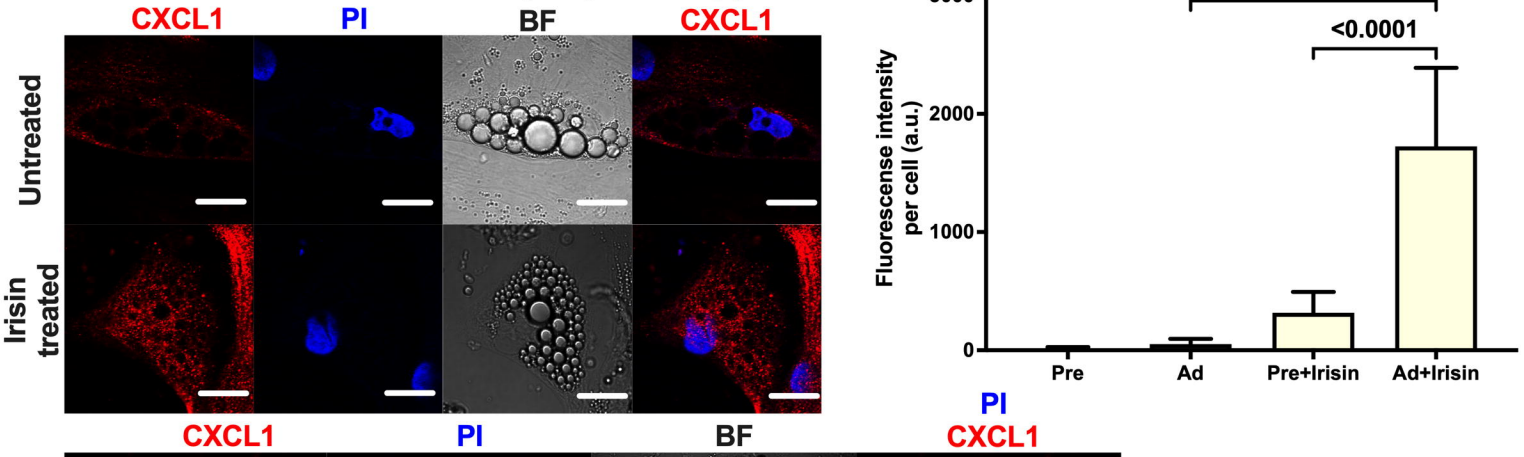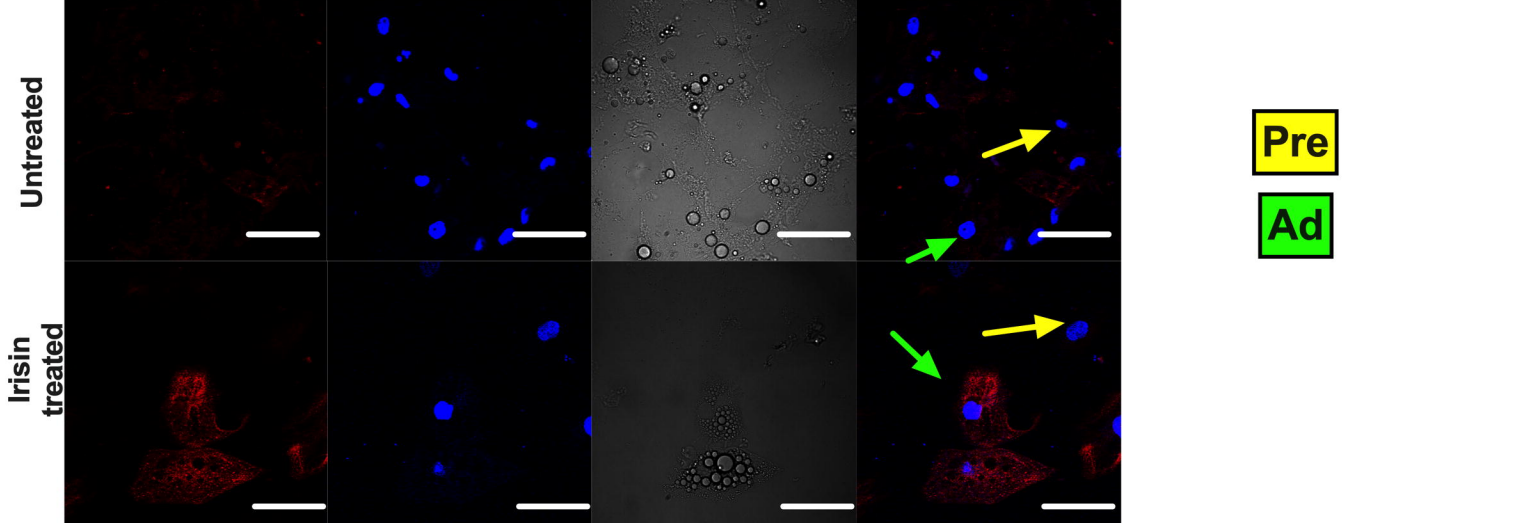

## B Deep neck area adipocytes

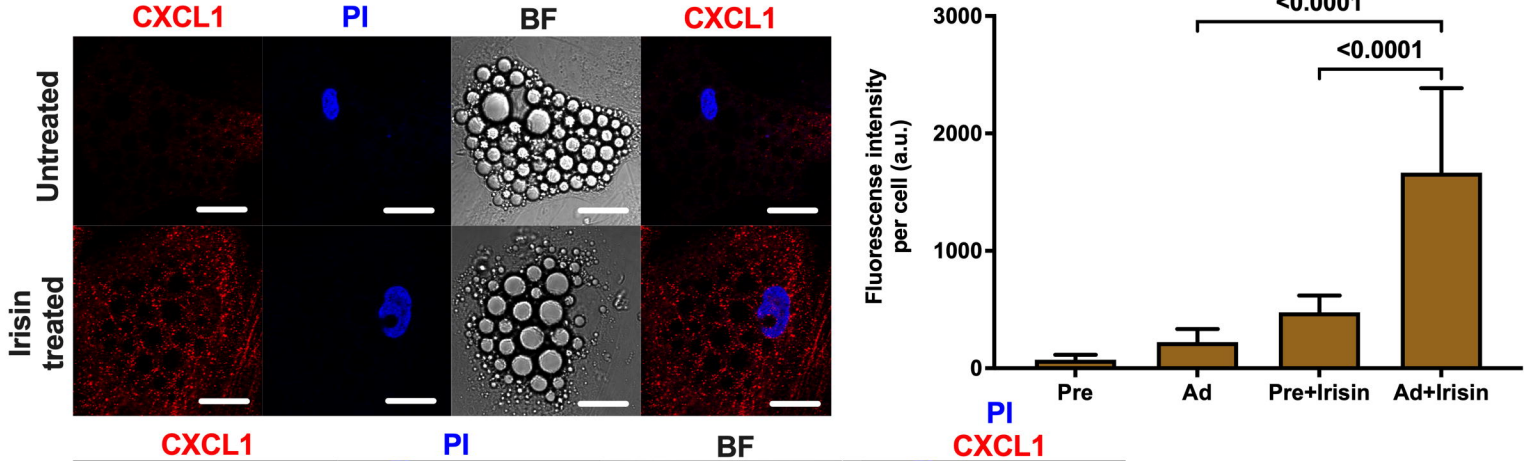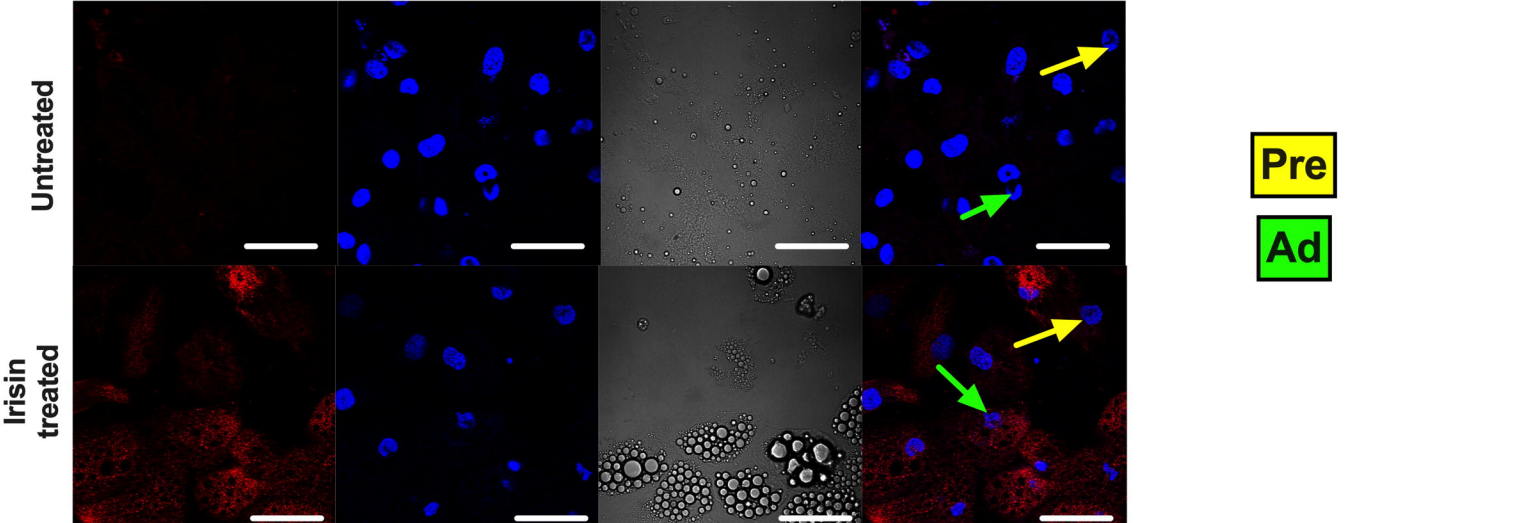

**A**

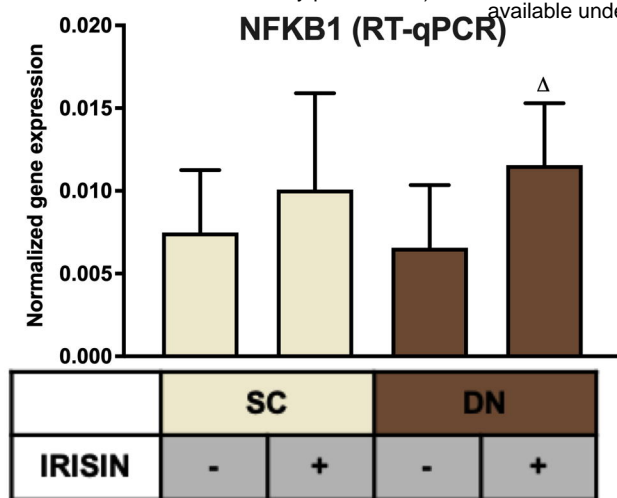

**B**

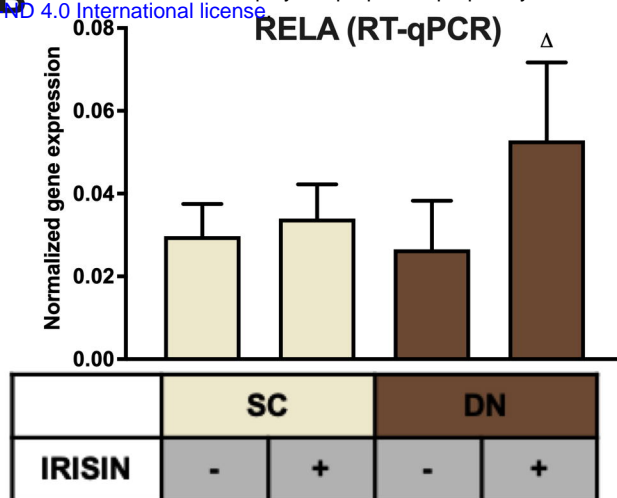

**C**

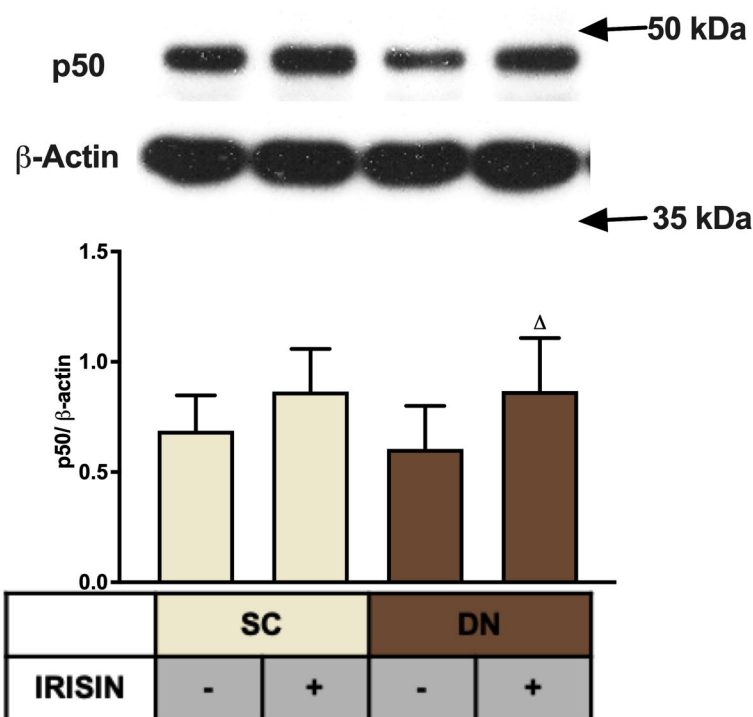

**D**

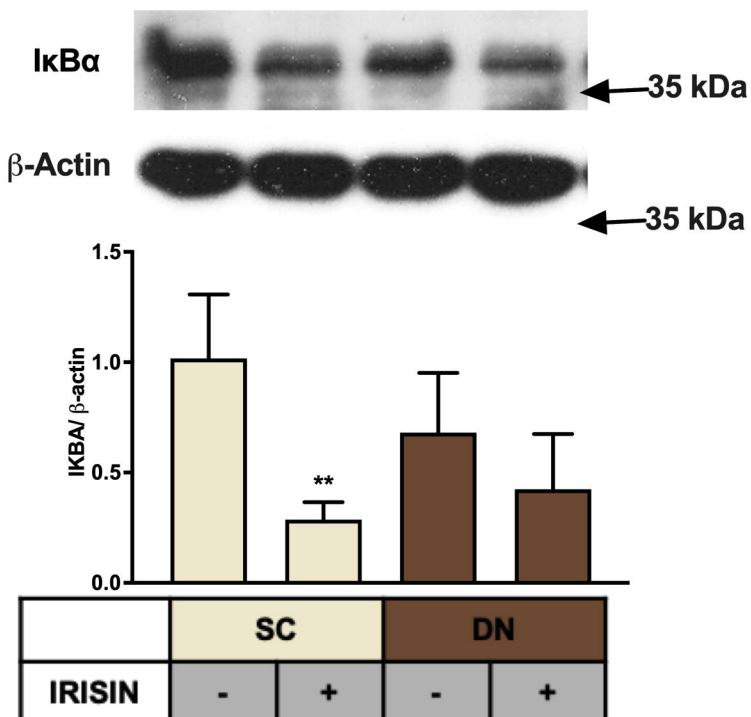

**E**

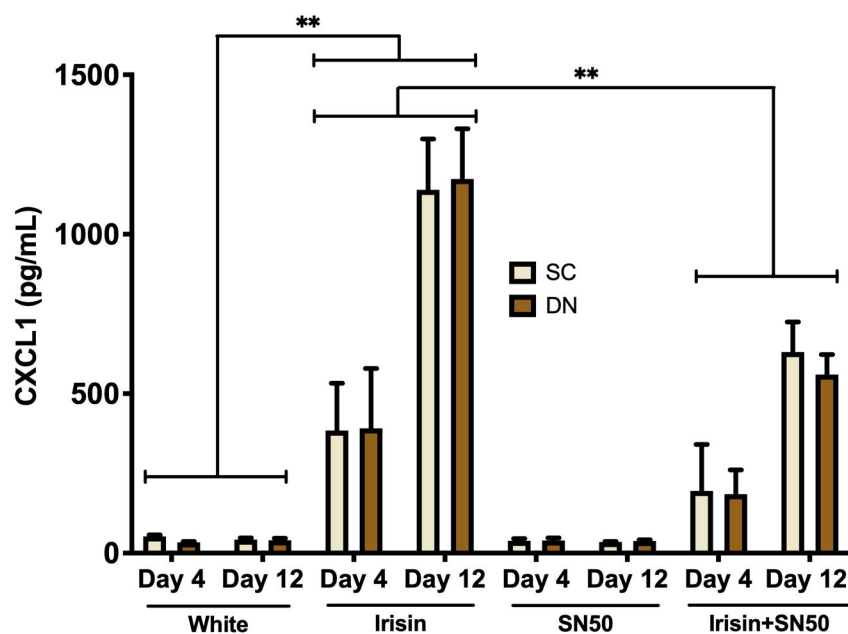

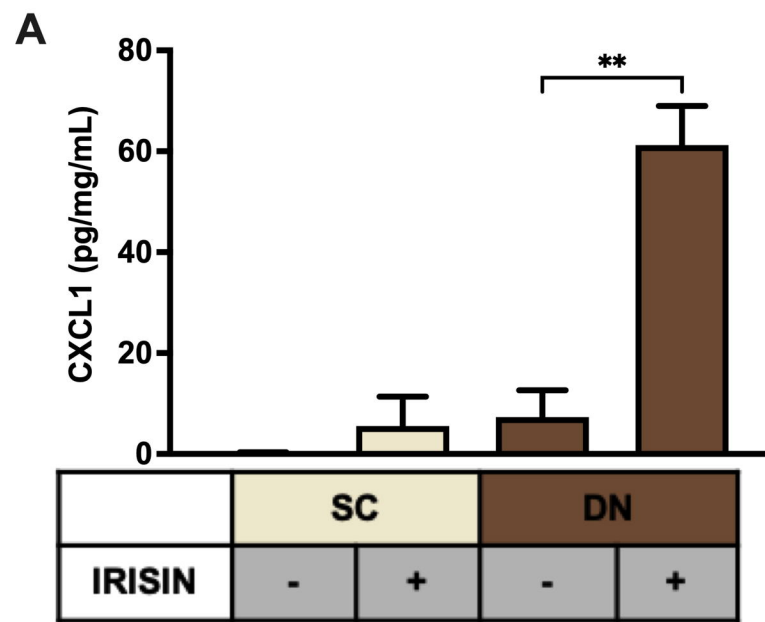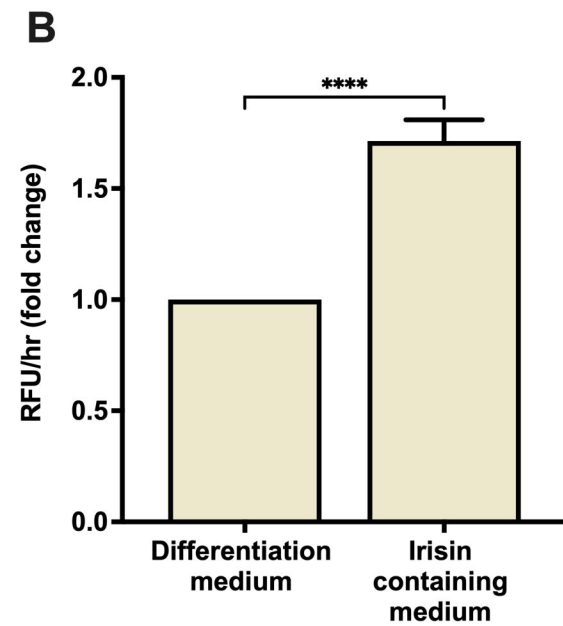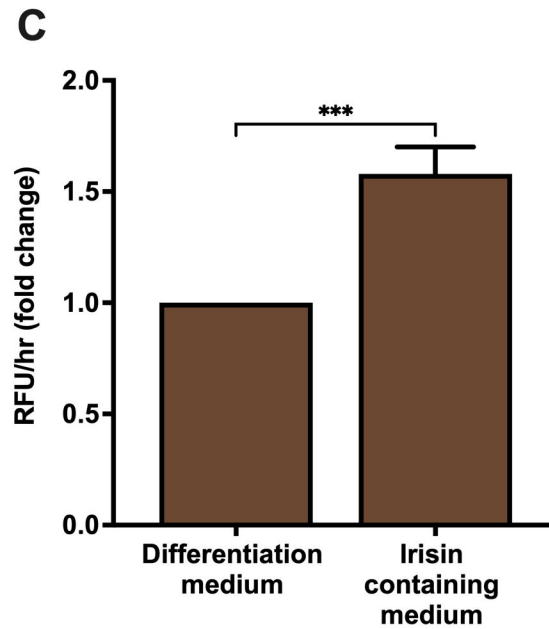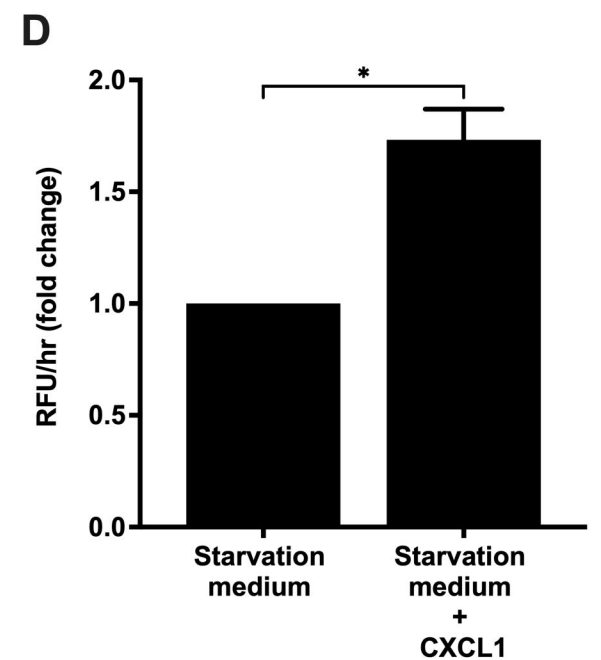

Source: https://biorxiv.org/content/10.1101/2021.07.06.451152v1.full.pdf
